# Supplementary material for: The kinetics of the reactions of Br atoms with the xylenes: an experimental and theoretical study
Source: Royal Society of Chemistry journal article supplement (doi:10.1039/d1cp03740d), 2022-01-01
Supplement: d1cp03740d1.pdf [file d1cp03740d1.pdf]

## Supplementary Information

### The Kinetics of the Reactions of Br Atoms with the Xylenes: An Experimental and Theoretical Study

Binod Raj Giri<sup>1,\*</sup>, Aamir Farooq<sup>1</sup>, Milán Szõri<sup>2</sup>, and John M. Roscoe<sup>3,\*</sup>

<sup>1</sup>*King Abdullah University of Science and Technology (KAUST), Clean Combustion Research Center, Division of Physical Sciences and Engineering, Thuwal 23955-6900, Saudi Arabia*

<sup>2</sup>*Institute of Chemistry, Faculty of Materials Science and Engineering, University of Miskolc, Egyetemváros A/4, H-3515 Miskolc, Hungary*

<sup>3</sup>Department of Chemistry, Acadia University, Wolfville, Nova Scotia, Canada B4P 2R6

\*Corresponding authors' e-mail: [Binod.Giri@kaust.edu.sa](mailto:Binod.Giri@kaust.edu.sa)

[John.Roscoe@acadiau.ca](mailto:John.Roscoe@acadiau.ca)

**Table S1:** Calculated unscaled harmonic vibrational wavenumbers and rotational constants of the species involved in *o*-xylene + Br reaction. Imaginary wavenumber is denoted by *i*. Wavenumbers corresponding to the torsional modes are shown in bold.

| Species             | MP2/aug-cc-pVDZ |      |            |        | G3          |      |            |        | G4          |      |            |        | B3LYP/cc-pVTZ |      |            |        |
|---------------------|-----------------|------|------------|--------|-------------|------|------------|--------|-------------|------|------------|--------|---------------|------|------------|--------|
|                     | Wavenumbers     |      |            | B(GHZ) | Wavenumbers |      |            | B(GHZ) | Wavenumbers |      |            | B(GHZ) | Wavenumbers   |      |            | B(GHZ) |
| <i>o</i> -xylene    | <b>116</b>      | 172  | <b>186</b> | 3.1386 | <b>131</b>  | 183  | <b>188</b> | 3.1774 | <b>134</b>  | 165  | <b>175</b> | 3.1673 | <b>137</b>    | 162  | <b>173</b> | 3.1758 |
|                     | 256             | 299  | 402        | 2.1171 | 280         | 325  | 440        | 2.1518 | 256         | 300  | 409        | 2.1523 | 255           | 302  | 413        | 2.1613 |
|                     | 431             | 491  | 494        | 1.2847 | 489         | 543  | 566        | 1.3037 | 450         | 508  | 521        | 1.3020 | 450           | 512  | 525        | 1.3066 |
|                     | 577             | 593  | 743        |        | 630         | 789  | 796        |        | 588         | 732  | 746        |        | 592           | 734  | 747        |        |
|                     | 745             | 822  | 847        |        | 842         | 892  | 980        |        | 766         | 833  | 883        |        | 759           | 839  | 881        |        |
|                     | 910             | 912  | 997        |        | 1057        | 1081 | 1101       |        | 926         | 969  | 1004       |        | 950           | 994  | 1004       |        |
|                     | 1000            | 1029 | 1043       |        | 1113        | 1150 | 1156       |        | 1009        | 1044 | 1073       |        | 1013          | 1048 | 1076       |        |
|                     | 1064            | 1132 | 1165       |        | 1182        | 1235 | 1236       |        | 1076        | 1140 | 1185       |        | 1077          | 1147 | 1187       |        |
|                     | 1202            | 1256 | 1287       |        | 1295        | 1339 | 1342       |        | 1203        | 1249 | 1312       |        | 1207          | 1244 | 1323       |        |
|                     | 1389            | 1400 | 1437       |        | 1439        | 1564 | 1575       |        | 1334        | 1410 | 1421       |        | 1327          | 1415 | 1424       |        |
|                     | 1461            | 1465 | 1484       |        | 1609        | 1626 | 1640       |        | 1464        | 1476 | 1492       |        | 1471          | 1480 | 1493       |        |
|                     | 1486            | 1500 | 1506       |        | 1641        | 1645 | 1668       |        | 1494        | 1501 | 1525       |        | 1497          | 1506 | 1528       |        |
|                     | 1614            | 1639 | 3047       |        | 1780        | 1814 | 3198       |        | 1619        | 1647 | 3022       |        | 1620          | 1649 | 3019       |        |
|                     | 3048            | 3122 | 3125       |        | 3202        | 3247 | 3249       |        | 3023        | 3069 | 3071       |        | 3020          | 3059 | 3061       |        |
|                     | 3156            | 3157 | 3188       |        | 3279        | 3282 | 3347       |        | 3113        | 3114 | 3160       |        | 3102          | 3104 | 3154       |        |
| 3192                | 3210            | 3225 |            | 3353   | 3367        | 3383 |            | 3164   | 3179        | 3194 |            | 3158   | 3172          | 3187 |            |        |
| 3,4-dimethyl phenyl | 145             | 204  | 214        | 3.2665 | 117         | 173  | 177        | 3.2980 | 134         | 166  | 177        | 3.1992 | 137           | 163  | 176        | 3.2083 |
|                     | 299             | 312  | 423        | 2.2631 | 270         | 322  | 437        | 2.2956 | 263         | 301  | 413        | 2.2410 | 261           | 303  | 417        | 2.2510 |
|                     | 512             | 520  | 587        | 1.3597 | 438         | 528  | 530        | 1.3765 | 440         | 507  | 509        | 1.3396 | 439           | 511  | 512        | 1.3447 |
|                     | 603             | 754  | 783        |        | 606         | 707  | 756        |        | 577         | 704  | 742        |        | 581           | 701  | 743        |        |
|                     | 820             | 909  | 987        |        | 825         | 863  | 891        |        | 795         | 812  | 864        |        | 790           | 815  | 860        |        |
|                     | 992             | 1028 | 1056       |        | 983         | 1066 | 1082       |        | 941         | 1005 | 1009       |        | 949           | 1005 | 1012       |        |
|                     | 1104            | 1105 | 1126       |        | 1109        | 1137 | 1159       |        | 1043        | 1072 | 1075       |        | 1046          | 1074 | 1077       |        |
|                     | 1145            | 1187 | 1228       |        | 1207        | 1255 | 1295       |        | 1132        | 1182 | 1233       |        | 1135          | 1185 | 1229       |        |
|                     | 1278            | 1308 | 1387       |        | 1377        | 1388 | 1469       |        | 1287        | 1311 | 1399       |        | 1292          | 1305 | 1401       |        |
|                     | 1405            | 1465 | 1468       |        | 1564        | 1574 | 1594       |        | 1411        | 1422 | 1476       |        | 1415          | 1425 | 1480       |        |
|                     | 1486            | 1489 | 1525       |        | 1616        | 1626 | 1633       |        | 1479        | 1486 | 1492       |        | 1484          | 1490 | 1493       |        |
|                     | 1586            | 1823 | 1873       |        | 1641        | 1653 | 1673       |        | 1498        | 1575 | 1626       |        | 1501          | 1576 | 1626       |        |
|                     | 3054            | 3058 | 3130       |        | 3197        | 3202 | 3246       |        | 3024        | 3024 | 3071       |        | 3020          | 3021 | 3061       |        |
| 3139                | 3165            | 3171 |            | 3250   | 3279        | 3281 |            | 3073   | 3115        | 3116 |            | 3063   | 3104          | 3106 |            |        |
| 3205                | 3231            | 3255 |            | 3353   | 3363        | 3379 |            | 3157   | 3170        | 3189 |            | 3151   | 3160          | 3178 |            |        |
| 2,3-dimethyl phenyl | 140             | 198  | 206        | 3.3910 | 111         | 161  | 173        | 3.4191 | 128         | 158  | 173        | 3.3133 | 131           | 154  | 171        | 3.3229 |

|                       |            |            |      |        |      |      |      |        |            |            |      |        |      |      |      |        |
|-----------------------|------------|------------|------|--------|------|------|------|--------|------------|------------|------|--------|------|------|------|--------|
|                       | 280        | 296        | 408  | 2.1592 | 254  | 304  | 419  | 2.1924 | 246        | 284        | 394  | 2.1402 | 244  | 286  | 398  | 2.1496 |
|                       | 512        | 544        | 588  | 1.3415 | 478  | 512  | 527  | 1.3583 | 471        | 497        | 511  | 1.3215 | 472  | 500  | 513  | 1.3265 |
|                       | 616        | 768        | 782  |        | 608  | 711  | 757  |        | 589        | 706        | 743  |        | 592  | 703  | 744  |        |
|                       | 830        | 875        | 988  |        | 795  | 876  | 921  |        | 767        | 823        | 890  |        | 758  | 827  | 894  |        |
|                       | 1015       | 1022       | 1062 |        | 1010 | 1054 | 1066 |        | 959        | 986        | 999  |        | 974  | 990  | 1000 |        |
|                       | 1110       | 1131       | 1134 |        | 1126 | 1132 | 1158 |        | 1037       | 1071       | 1087 |        | 1039 | 1073 | 1086 |        |
|                       | 1147       | 1167       | 1234 |        | 1224 | 1244 | 1278 |        | 1134       | 1181       | 1218 |        | 1140 | 1182 | 1218 |        |
|                       | 1255       | 1306       | 1386 |        | 1351 | 1383 | 1536 |        | 1266       | 1315       | 1405 |        | 1268 | 1307 | 1410 |        |
|                       | 1402       | 1465       | 1470 |        | 1562 | 1563 | 1577 |        | 1417       | 1433       | 1477 |        | 1421 | 1439 | 1480 |        |
|                       | 1486       | 1487       | 1537 |        | 1613 | 1626 | 1633 |        | 1481       | 1492       | 1493 |        | 1483 | 1494 | 1495 |        |
|                       | 1592       | 1815       | 1891 |        | 1640 | 1648 | 1688 |        | 1493       | 1557       | 1645 |        | 1496 | 1559 | 1644 |        |
|                       | 3057       | 3061       | 3134 |        | 3198 | 3202 | 3247 |        | 3025       | 3026       | 3073 |        | 3022 | 3023 | 3063 |        |
|                       | 3141       | 3171       | 3180 |        | 3250 | 3280 | 3287 |        | 3076       | 3115       | 3127 |        | 3066 | 3104 | 3116 |        |
|                       | 3215       | 3233       | 3256 |        | 3350 | 3366 | 3382 |        | 3162       | 3178       | 3190 |        | 3156 | 3170 | 3182 |        |
| <b>PC<sub>o</sub></b> | 36         | 47         | 69   | 1.3512 | 13   | 14   | 40   | 1.3891 | 17         | 19         | 65   | 1.5119 | 6    | 15   | 50   | 1.5666 |
|                       | 156        | 175        | 215  | 0.6857 | 109  | 142  | 157  | 0.6399 | 159        | 177        | 257  | 0.5063 | 153  | 172  | 247  | 0.4582 |
|                       | 234        | 288        | 333  | 0.6289 | 186  | 264  | 345  | 0.5945 | 292        | 325        | 351  | 0.4735 | 257  | 280  | 326  | 0.4367 |
|                       | 416        | 438        | 504  |        | 425  | 439  | 507  |        | 411        | 421        | 494  |        | 416  | 421  | 494  |        |
|                       | 509        | 558        | 601  |        | 529  | 554  | 614  |        | 504        | 540        | 588  |        | 507  | 543  | 593  |        |
|                       | 706        | 749        | 776  |        | 708  | 750  | 763  |        | 712        | 745        | 746  |        | 716  | 744  | 747  |        |
|                       | 837        | 857        | 959  |        | 789  | 887  | 903  |        | 783        | 855        | 873  |        | 787  | 862  | 873  |        |
|                       | 985        | 1011       | 1037 |        | 971  | 1010 | 1039 |        | 932        | 967        | 975  |        | 952  | 978  | 990  |        |
|                       | 1063       | 1085       | 1091 |        | 1067 | 1109 | 1146 |        | 1002       | 1058       | 1063 |        | 1005 | 1061 | 1063 |        |
|                       | 1154       | 1164       | 1207 |        | 1211 | 1246 | 1271 |        | 1147       | 1178       | 1198 |        | 1152 | 1180 | 1198 |        |
|                       | 1266       | 1280       | 1319 |        | 1344 | 1409 | 1413 |        | 1291       | 1308       | 1335 |        | 1292 | 1317 | 1331 |        |
|                       | 1398       | 1466       | 1477 |        | 1564 | 1567 | 1586 |        | 1412       | 1452       | 1481 |        | 1417 | 1458 | 1485 |        |
|                       | 1500       | 1510       | 1540 |        | 1632 | 1634 | 1644 |        | 1486       | 1496       | 1508 |        | 1493 | 1501 | 1512 |        |
|                       | 1680       | 1714       | 2601 |        | 1653 | 1669 | 2806 |        | 1563       | 1600       | 2514 |        | 1567 | 1605 | 2556 |        |
|                       | 3056       | 3136       | 3169 |        | 3201 | 3252 | 3283 |        | 3026       | 3076       | 3118 |        | 3021 | 3064 | 3107 |        |
|                       | 3210       | 3214       | 3218 |        | 3343 | 3352 | 3357 |        | 3166       | 3168       | 3172 |        | 3159 | 3160 | 3167 |        |
|                       | 3236       | 3252       | 3328 |        | 3369 | 3384 | 3439 |        | 3186       | 3202       | 3267 |        | 3179 | 3192 | 3256 |        |
| <b>RC<sub>o</sub></b> | 75         | 105        | 138  | 1.4214 | 23   | 32   | 38   | 1.6786 | 40         | 60         | 113  | 1.6097 | 39   | 59   | 108  | 1.6157 |
|                       | <b>176</b> | <b>201</b> | 211  | 0.8924 | 120  | 175  | 179  | 0.6843 | <b>133</b> | <b>167</b> | 195  | 0.7202 | 136  | 167  | 192  | 0.7106 |
|                       | 268        | 303        | 401  | 0.7400 | 269  | 322  | 434  | 0.6051 | 258        | 301        | 408  | 0.6020 | 256  | 303  | 412  | 0.5961 |
|                       | 463        | 491        | 498  |        | 463  | 532  | 534  |        | 446        | 499        | 514  |        | 447  | 504  | 519  |        |
|                       | 572        | 646        | 743  |        | 614  | 738  | 760  |        | 581        | 706        | 743  |        | 586  | 709  | 746  |        |
|                       | 773        | 820        | 874  |        | 802  | 883  | 927  |        | 772        | 829        | 897  |        | 767  | 834  | 894  |        |
|                       | 911        | 943        | 996  |        | 1001 | 1047 | 1066 |        | 938        | 976        | 1001 |        | 951  | 1000 | 1005 |        |
|                       | 1003       | 1036       | 1058 |        | 1086 | 1116 | 1142 |        | 1008       | 1039       | 1070 |        | 1011 | 1044 | 1073 |        |
|                       | 1068       | 1130       | 1169 |        | 1165 | 1220 | 1254 |        | 1073       | 1135       | 1187 |        | 1074 | 1142 | 1191 |        |

|                 |      |            |      |        |       |      |      |        |      |            |      |        |      |      |      |        |
|-----------------|------|------------|------|--------|-------|------|------|--------|------|------------|------|--------|------|------|------|--------|
|                 | 1205 | 1253       | 1287 |        | 1277  | 1306 | 1377 |        | 1197 | 1238       | 1304 |        | 1202 | 1236 | 1315 |        |
|                 | 1390 | 1400       | 1430 |        | 1421  | 1564 | 1574 |        | 1343 | 1409       | 1421 |        | 1338 | 1414 | 1425 |        |
|                 | 1460 | 1470       | 1479 |        | 1585  | 1622 | 1626 |        | 1449 | 1473       | 1490 |        | 1459 | 1479 | 1493 |        |
|                 | 1484 | 1506       | 1515 |        | 1638  | 1640 | 1649 |        | 1491 | 1492       | 1514 |        | 1495 | 1498 | 1520 |        |
|                 | 1609 | 1649       | 3048 |        | 1685  | 1720 | 3198 |        | 1595 | 1608       | 3029 |        | 1601 | 1612 | 3025 |        |
|                 | 3053 | 3127       | 3138 |        | 3203  | 3248 | 3251 |        | 3030 | 3079       | 3083 |        | 3026 | 3067 | 3071 |        |
|                 | 3160 | 3168       | 3194 |        | 3280  | 3282 | 3349 |        | 3120 | 3131       | 3170 |        | 3108 | 3119 | 3163 |        |
|                 | 3204 | 3216       | 3232 |        | 3354  | 3368 | 3383 |        | 3191 | 3199       | 3213 |        | 3183 | 3191 | 3204 |        |
| 2-methyl benzyl | 171  | 215        | 282  | 3.2523 | 156   | 186  | 262  | 3.2897 | 156  | 186        | 258  | 3.2304 | 154  | 182  | 257  | 3.2389 |
|                 | 333  | 416        | 444  | 2.2387 | 345   | 424  | 439  | 2.2705 | 326  | 412        | 421  | 2.2355 | 327  | 416  | 422  | 2.2448 |
|                 | 504  | 516        | 562  | 1.3372 | 506   | 529  | 555  | 1.3546 | 493  | 504        | 540  | 1.3321 | 493  | 508  | 542  | 1.3368 |
|                 | 602  | 704        | 750  |        | 614   | 706  | 744  |        | 589  | 706        | 736  |        | 594  | 713  | 735  |        |
|                 | 774  | 826        | 859  |        | 763   | 783  | 880  |        | 746  | 779        | 856  |        | 747  | 780  | 861  |        |
|                 | 948  | 985        | 1009 |        | 903   | 965  | 1005 |        | 867  | 924        | 960  |        | 868  | 947  | 979  |        |
|                 | 1025 | 1044       | 1082 |        | 1038  | 1067 | 1109 |        | 977  | 1003       | 1058 |        | 983  | 1006 | 1061 |        |
|                 | 1085 | 1150       | 1165 |        | 1145  | 1210 | 1246 |        | 1065 | 1147       | 1177 |        | 1065 | 1152 | 1179 |        |
|                 | 1205 | 1269       | 1281 |        | 1270  | 1343 | 1409 |        | 1198 | 1290       | 1308 |        | 1197 | 1291 | 1316 |        |
|                 | 1319 | 1397       | 1466 |        | 1415  | 1564 | 1566 |        | 1335 | 1413       | 1453 |        | 1330 | 1418 | 1458 |        |
|                 | 1477 | 1500       | 1510 |        | 1587  | 1633 | 1635 |        | 1482 | 1489       | 1498 |        | 1486 | 1493 | 1502 |        |
|                 | 1539 | 1675       | 1709 |        | 1644  | 1653 | 1669 |        | 1510 | 1566       | 1604 |        | 1513 | 1570 | 1606 |        |
|                 | 3055 | 3134       | 3167 |        | 3199  | 3248 | 3279 |        | 3024 | 3072       | 3115 |        | 3019 | 3061 | 3104 |        |
|                 | 3208 | 3211       | 3216 |        | 3341  | 3348 | 3353 |        | 3162 | 3165       | 3169 |        | 3156 | 3158 | 3163 |        |
| 3235            | 3250 | 3325       |      | 3366   | 3381  | 3436 |      | 3182   | 3197 | 3263       |      | 3176   | 3190 | 3252 |      |        |
| TS <sub>o</sub> | 763i | 44         | 55   | 1.9479 | 1545i | 45   | 52   | 1.9567 | 306i | 37         | 44   | 1.9011 | 489i | 40   | 45   | 1.9199 |
|                 | 165  | <b>209</b> | 274  | 0.5184 | 149   | 177  | 250  | 0.4993 | 152  | <b>181</b> | 258  | 0.4749 | 148  | 175  | 255  | 0.4753 |
|                 | 330  | 402        | 419  | 0.4760 | 342   | 358  | 432  | 0.4574 | 326  | 408        | 437  | 0.4318 | 327  | 411  | 432  | 0.4316 |
|                 | 481  | 513        | 530  |        | 454   | 512  | 530  |        | 482  | 504        | 525  |        | 460  | 505  | 528  |        |
|                 | 558  | 607        | 728  |        | 542   | 616  | 723  |        | 556  | 600        | 726  |        | 528  | 599  | 724  |        |
|                 | 787  | 825        | 853  |        | 766   | 787  | 894  |        | 748  | 779        | 832  |        | 750  | 770  | 835  |        |
|                 | 879  | 930        | 981  |        | 902   | 978  | 1003 |        | 853  | 863        | 885  |        | 861  | 878  | 897  |        |
|                 | 1008 | 1020       | 1061 |        | 1029  | 1047 | 1073 |        | 940  | 975        | 992  |        | 964  | 997  | 1000 |        |
|                 | 1082 | 1100       | 1105 |        | 1111  | 1150 | 1197 |        | 1007 | 1060       | 1069 |        | 1011 | 1063 | 1071 |        |
|                 | 1146 | 1158       | 1176 |        | 1227  | 1252 | 1280 |        | 1148 | 1183       | 1209 |        | 1153 | 1182 | 1188 |        |
|                 | 1236 | 1270       | 1283 |        | 1287  | 1349 | 1405 |        | 1225 | 1311       | 1336 |        | 1212 | 1306 | 1324 |        |
|                 | 1324 | 1398       | 1467 |        | 1421  | 1569 | 1574 |        | 1349 | 1415       | 1458 |        | 1335 | 1421 | 1465 |        |
|                 | 1481 | 1497       | 1524 |        | 1604  | 1630 | 1635 |        | 1485 | 1494       | 1500 |        | 1489 | 1501 | 1505 |        |
|                 | 1560 | 1739       | 1765 |        | 1646  | 1657 | 1687 |        | 1506 | 1575       | 1613 |        | 1509 | 1581 | 1618 |        |
|                 | 3057 | 3140       | 3155 |        | 3202  | 3257 | 3289 |        | 3029 | 3082       | 3122 |        | 3026 | 3071 | 3111 |        |
|                 | 3172 | 3217       | 3222 |        | 3306  | 3357 | 3362 |        | 3142 | 3171       | 3177 |        | 3133 | 3164 | 3170 |        |
|                 | 3239 | 3253       | 3264 |        | 3374  | 3388 | 3392 |        | 3189 | 3202       | 3236 |        | 3182 | 3195 | 3223 |        |

**Table S2:** Calculated harmonic vibrational wavenumbers and rotational constants of the species involved in *m*-xylene + Br reaction. Imaginary wavenumber is denoted by *i*. Wavenumbers corresponding to the torsional modes are shown in bold.

| Species             | MP2/aug-cc-pVDZ |           |      |        | G3          |           |      |        | G4          |           |      |        | B3LYP       |           |      |        |
|---------------------|-----------------|-----------|------|--------|-------------|-----------|------|--------|-------------|-----------|------|--------|-------------|-----------|------|--------|
|                     | Wavenumbers     |           |      | B(GHZ) | Wavenumbers |           |      | B(GHZ) | Wavenumbers |           |      | B(GHZ) | Wavenumbers |           |      | B(GHZ) |
| <i>m</i> -xylene    | <b>30</b>       | <b>34</b> | 201  | 3.5365 | <b>27</b>   | <b>31</b> | 215  | 3.5772 | <b>24</b>   | <b>36</b> | 200  | 3.5844 | <b>16</b>   | <b>42</b> | 196  | 3.5947 |
|                     | 213             | 270       | 397  | 1.7323 | 244         | 291       | 431  | 1.7641 | 222         | 270       | 398  | 1.7598 | 221         | 275       | 405  | 1.7678 |
|                     | 427             | 505       | 506  | 1.1801 | 485         | 557       | 577  | 1.1992 | 444         | 519       | 530  | 1.1979 | 445         | 525       | 529  | 1.2026 |
|                     | 531             | 620       | 724  |        | 578         | 770       | 786  |        | 543         | 716       | 734  | 1.4519 | 547         | 715       | 739  |        |
|                     | 758             | 865       | 882  |        | 873         | 984       | 998  |        | 795         | 897       | 902  |        | 788         | 901       | 911  |        |
|                     | 924             | 926       | 991  |        | 1012        | 1078      | 1093 |        | 920         | 961       | 998  |        | 922         | 990       | 1001 |        |
|                     | 1002            | 1027      | 1038 |        | 1106        | 1109      | 1172 |        | 1013        | 1034      | 1061 |        | 1021        | 1036      | 1065 |        |
|                     | 1047            | 1108      | 1173 |        | 1174        | 1211      | 1246 |        | 1063        | 1123      | 1183 |        | 1066        | 1125      | 1181 |        |
|                     | 1189            | 1278      | 1302 |        | 1288        | 1330      | 1378 |        | 1198        | 1273      | 1324 |        | 1199        | 1274      | 1321 |        |
|                     | 1392            | 1397      | 1438 |        | 1466        | 1565      | 1567 |        | 1344        | 1410      | 1413 |        | 1351        | 1415      | 1417 |        |
|                     | 1460            | 1475      | 1476 |        | 1588        | 1632      | 1632 |        | 1450        | 1486      | 1487 |        | 1453        | 1489      | 1491 |        |
|                     | 1491            | 1500      | 1501 |        | 1635        | 1650      | 1668 |        | 1488        | 1507      | 1525 |        | 1492        | 1508      | 1530 |        |
|                     | 1624            | 1644      | 3055 |        | 1792        | 1816      | 3202 |        | 1629        | 1649      | 3026 |        | 1631        | 1650      | 3022 |        |
|                     | 3055            | 3137      | 3137 |        | 3202        | 3253      | 3253 |        | 3029        | 3082      | 3084 |        | 3022        | 3073      | 3073 |        |
|                     | 3157            | 3157      | 3180 |        | 3279        | 3280      | 3341 |        | 3112        | 3112      | 3152 |        | 3100        | 3101      | 3145 |        |
| 3187                | 3195            | 3217      |      | 3345   | 3357        | 3376      |      | 3160   | 3168        | 3187      |      | 3154   | 3163        | 3181      |      |        |
| 3,5-dimethyl phenyl | 28              | 29        | 230  | 3.9454 | 3           | 30        | 199  | 3.9820 | 15          | 33        | 201  | 3.8766 | 30          | 44        | 199  | 3.8930 |
|                     | 244             | 282       | 420  | 1.7698 | 224         | 287       | 430  | 1.7975 | 213         | 272       | 405  | 1.7473 | 213         | 275       | 409  | 1.7545 |
|                     | 526             | 550       | 563  | 1.2409 | 480         | 513       | 536  | 1.2579 | 467         | 503       | 519  | 1.2227 | 470         | 507       | 517  | 1.2278 |
|                     | 607             | 737       | 770  |        | 561         | 682       | 747  |        | 542         | 680       | 720  |        | 544         | 674       | 724  |        |
|                     | 912             | 980       | 997  |        | 865         | 893       | 926  |        | 839         | 863       | 892  |        | 835         | 859       | 895  |        |
|                     | 1002            | 1014      | 1015 |        | 971         | 1042      | 1071 |        | 929         | 994       | 1004 |        | 929         | 998       | 1009 |        |
|                     | 1038            | 1109      | 1110 |        | 1110        | 1141      | 1151 |        | 1026        | 1059      | 1061 |        | 1027        | 1062      | 1063 |        |
|                     | 1146            | 1166      | 1222 |        | 1152        | 1259      | 1329 |        | 1098        | 1179      | 1256 |        | 1100        | 1177      | 1256 |        |
|                     | 1292            | 1297      | 1392 |        | 1362        | 1404      | 1517 |        | 1283        | 1309      | 1409 |        | 1287        | 1303      | 1413 |        |
|                     | 1393            | 1475      | 1478 |        | 1528        | 1565      | 1567 |        | 1411        | 1434      | 1471 |        | 1415        | 1437      | 1472 |        |
|                     | 1479            | 1484      | 1553 |        | 1617        | 1633      | 1635 |        | 1484        | 1485      | 1495 |        | 1487        | 1489      | 1496 |        |
|                     | 1594            | 1824      | 1891 |        | 1639        | 1646      | 1700 |        | 1498        | 1553      | 1643 |        | 1500        | 1555      | 1642 |        |
|                     | 3071            | 3071      | 3160 |        | 3198        | 3199      | 3253 |        | 3029        | 3030      | 3086 |        | 3023        | 3026      | 3074 |        |
|                     | 3160            | 3175      | 3175 |        | 3254        | 3277      | 3278 |        | 3086        | 3114      | 3115 |        | 3076        | 3103      | 3103 |        |
|                     | 3212            | 3234      | 3235 |        | 3340        | 3362      | 3365 |        | 3161        | 3171      | 3172 |        | 3154        | 3160      | 3162 |        |

|                            |      |      |      |        |      |      |      |        |      |      |      |        |      |      |      |        |
|----------------------------|------|------|------|--------|------|------|------|--------|------|------|------|--------|------|------|------|--------|
| <b>2,4-dimethyl phenyl</b> | 78   | 93   | 223  | 3.6978 | 17   | 43   | 195  |        | 30   | 63   | 194  | 3.6532 | 36   | 64   | 193  | 3.6695 |
|                            | 268  | 273  | 408  | 1.8094 | 235  | 281  | 422  | 3.7508 | 233  | 266  | 398  | 1.7876 | 233  | 270  | 404  | 1.7941 |
|                            | 495  | 536  | 558  | 1.2338 | 436  | 538  | 540  | 1.8321 | 429  | 517  | 533  | 1.2184 | 429  | 520  | 534  | 1.2231 |
|                            | 606  | 746  | 760  |        | 559  | 705  | 751  | 1.2500 | 538  | 692  | 724  |        | 541  | 690  | 727  |        |
|                            | 918  | 944  | 995  |        | 828  | 928  | 948  |        | 801  | 893  | 904  |        | 795  | 886  | 907  |        |
|                            | 1003 | 1011 | 1022 |        | 982  | 1029 | 1074 |        | 939  | 995  | 998  |        | 948  | 999  | 1002 |        |
|                            | 1070 | 1110 | 1124 |        | 1110 | 1149 | 1152 |        | 1033 | 1057 | 1065 |        | 1034 | 1061 | 1067 |        |
|                            | 1140 | 1215 | 1221 |        | 1199 | 1244 | 1315 |        | 1144 | 1177 | 1246 |        | 1143 | 1176 | 1247 |        |
|                            | 1295 | 1323 | 1397 |        | 1376 | 1390 | 1496 |        | 1292 | 1327 | 1405 |        | 1294 | 1321 | 1408 |        |
|                            | 1400 | 1475 | 1477 |        | 1548 | 1565 | 1570 |        | 1411 | 1415 | 1452 |        | 1415 | 1420 | 1457 |        |
|                            | 1479 | 1486 | 1540 |        | 1630 | 1632 | 1634 |        | 1483 | 1487 | 1497 |        | 1485 | 1490 | 1499 |        |
|                            | 1572 | 1829 | 1877 |        | 1642 | 1660 | 1680 |        | 1502 | 1597 | 1629 |        | 1505 | 1598 | 1629 |        |
|                            | 3066 | 3073 | 3151 |        | 3199 | 3204 | 3249 |        | 3029 | 3036 | 3083 |        | 3026 | 3032 | 3072 |        |
|                            | 3163 | 3169 | 3175 |        | 3257 | 3277 | 3279 |        | 3092 | 3114 | 3117 |        | 3081 | 3103 | 3106 |        |
| 3184                       | 3214 | 3245 |      | 3338   | 3354 | 3376 |      | 3144   | 3162 | 3183 |      | 3137   | 3155 | 3174 |      |        |
| <b>2,6-dimethyl phenyl</b> | 58   | 64   | 216  | 3.7434 | 28   | 33   | 196  | 3.7887 | 18   | 30   | 191  | 3.6888 | 27   | 39   | 189  | 3.7007 |
|                            | 260  | 266  | 398  | 1.7682 | 219  | 273  | 412  | 1.7942 | 219  | 258  | 387  | 1.7501 | 217  | 261  | 391  | 1.7578 |
|                            | 524  | 540  | 562  | 1.2194 | 473  | 522  | 536  | 1.2363 | 470  | 506  | 518  | 1.2046 | 475  | 509  | 517  | 1.2095 |
|                            | 587  | 764  | 767  |        | 561  | 713  | 758  |        | 544  | 697  | 736  |        | 546  | 696  | 740  |        |
|                            | 885  | 937  | 975  |        | 809  | 943  | 963  |        | 789  | 893  | 911  |        | 780  | 893  | 913  |        |
|                            | 1018 | 1024 | 1050 |        | 1012 | 1027 | 1061 |        | 963  | 973  | 1005 |        | 979  | 980  | 1008 |        |
|                            | 1086 | 1117 | 1120 |        | 1132 | 1147 | 1150 |        | 1051 | 1055 | 1058 |        | 1051 | 1057 | 1062 |        |
|                            | 1147 | 1169 | 1237 |        | 1161 | 1246 | 1344 |        | 1111 | 1185 | 1253 |        | 1111 | 1186 | 1253 |        |
|                            | 1295 | 1317 | 1397 |        | 1346 | 1396 | 1487 |        | 1275 | 1326 | 1410 |        | 1273 | 1320 | 1414 |        |
|                            | 1400 | 1474 | 1477 |        | 1564 | 1568 | 1586 |        | 1411 | 1412 | 1478 |        | 1415 | 1416 | 1483 |        |
|                            | 1478 | 1487 | 1552 |        | 1630 | 1630 | 1638 |        | 1482 | 1483 | 1496 |        | 1485 | 1485 | 1498 |        |
|                            | 1574 | 1811 | 1888 |        | 1642 | 1659 | 1672 |        | 1501 | 1579 | 1640 |        | 1504 | 1579 | 1640 |        |
|                            | 3073 | 3074 | 3164 |        | 3204 | 3205 | 3257 |        | 3036 | 3037 | 3093 |        | 3032 | 3033 | 3082 |        |
|                            | 3164 | 3175 | 3175 |        | 3258 | 3279 | 3279 |        | 3093 | 3117 | 3118 |        | 3082 | 3106 | 3106 |        |
| 3204                       | 3212 | 3243 |      | 3346   | 3355 | 3375 |      | 3156   | 3161 | 3189 |      | 3150   | 3155 | 3183 |      |        |
| <b>PC<sub>m</sub></b>      | 31   | 46   | 73   | 1.2452 | 12   | 16   | 39   | 1.2651 | 22   | 24   | 53   | 1.2767 | 20   | 23   | 43   | 1.2783 |
|                            | 95   | 221  | 230  | 0.7089 | 50   | 118  | 129  | 0.6712 | 66   | 202  | 210  | 0.5987 | 68   | 199  | 209  | 0.5720 |
|                            | 253  | 285  | 302  | 0.5960 | 202  | 214  | 299  | 0.5678 | 281  | 303  | 366  | 0.5111 | 280  | 282  | 292  | 0.4925 |
|                            | 413  | 448  | 513  |        | 429  | 436  | 537  |        | 407  | 424  | 510  |        | 412  | 426  | 511  |        |
|                            | 520  | 557  | 576  |        | 538  | 548  | 568  |        | 514  | 545  | 546  |        | 518  | 544  | 549  |        |
|                            | 710  | 754  | 758  |        | 683  | 736  | 767  |        | 692  | 734  | 742  |        | 693  | 740  | 746  |        |
|                            | 846  | 963  | 964  |        | 810  | 900  | 914  |        | 800  | 875  | 891  |        | 798  | 882  | 903  |        |
|                            | 984  | 989  | 995  |        | 973  | 1008 | 1035 |        | 932  | 968  | 980  |        | 934  | 982  | 992  |        |
|                            | 1037 | 1069 | 1091 |        | 1049 | 1112 | 1152 |        | 989  | 1038 | 1062 |        | 995  | 1040 | 1066 |        |
|                            | 1157 | 1174 | 1215 |        | 1166 | 1248 | 1269 |        | 1120 | 1184 | 1198 |        | 1121 | 1185 | 1198 |        |

|                        |              |           |      |        |               |           |      |        |              |           |      |        |              |           |      |        |
|------------------------|--------------|-----------|------|--------|---------------|-----------|------|--------|--------------|-----------|------|--------|--------------|-----------|------|--------|
|                        | 1246         | 1285      | 1331 |        | 1362          | 1406      | 1450 |        | 1289         | 1327      | 1344 |        | 1290         | 1328      | 1349 |        |
|                        | 1399         | 1472      | 1476 |        | 1514          | 1568      | 1598 |        | 1414         | 1434      | 1484 |        | 1419         | 1440      | 1488 |        |
|                        | 1493         | 1511      | 1543 |        | 1631          | 1632      | 1639 |        | 1493         | 1495      | 1504 |        | 1497         | 1498      | 1509 |        |
|                        | 1686         | 1721      | 2531 |        | 1650          | 1683      | 2807 |        | 1574         | 1600      | 2493 |        | 1577         | 1604      | 2523 |        |
|                        | 3064         | 3149      | 3171 |        | 3201          | 3253      | 3281 |        | 3034         | 3089      | 3119 |        | 3029         | 3077      | 3107 |        |
|                        | 3201         | 3206      | 3218 |        | 3331          | 3350      | 3354 |        | 3158         | 3163      | 3170 |        | 3149         | 3158      | 3163 |        |
|                        | 3230         | 3244      | 3322 |        | 3360          | 3377      | 3425 |        | 3180         | 3194      | 3257 |        | 3173         | 3187      | 3245 |        |
| <b>RC<sub>m</sub></b>  | 79           | <b>85</b> | 108  | 1.3420 | 16            | <b>20</b> | 26   | 1.3391 | 65           | <b>75</b> | 84   | 1.3294 | 62           | <b>66</b> | 74   | 1.3335 |
|                        | <b>126</b>   | 141       | 225  | 0.9053 | <b>30</b>     | 37        | 217  | 0.8813 | <b>84</b>    | 112       | 221  | 0.8768 | <b>80</b>    | 107       | 220  | 0.8663 |
|                        | 262          | 270       | 397  | 0.7222 | 243           | 291       | 431  | 0.7073 | 228          | 275       | 399  | 0.6591 | 225          | 277       | 403  | 0.6541 |
|                        | 451          | 503       | 530  |        | 486           | 556       | 577  |        | 437          | 511       | 527  |        | 440          | 515       | 529  |        |
|                        | 535          | 681       | 731  |        | 578           | 771       | 785  |        | 534          | 697       | 733  |        | 538          | 701       | 737  |        |
|                        | 772          | 888       | 907  |        | 874           | 983       | 1000 |        | 796          | 904       | 908  |        | 791          | 905       | 910  |        |
|                        | 930          | 967       | 988  |        | 1013          | 1079      | 1093 |        | 909          | 977       | 983  |        | 915          | 986       | 1002 |        |
|                        | 1004         | 1036      | 1042 |        | 1108          | 1109      | 1172 |        | 1017         | 1041      | 1056 |        | 1022         | 1042      | 1061 |        |
|                        | 1078         | 1111      | 1178 |        | 1174          | 1211      | 1246 |        | 1062         | 1116      | 1180 |        | 1065         | 1119      | 1180 |        |
|                        | 1185         | 1279      | 1303 |        | 1288          | 1331      | 1376 |        | 1191         | 1269      | 1329 |        | 1193         | 1271      | 1329 |        |
|                        | 1393         | 1396      | 1428 |        | 1466          | 1566      | 1568 |        | 1345         | 1406      | 1407 |        | 1351         | 1411      | 1413 |        |
|                        | 1464         | 1472      | 1474 |        | 1585          | 1631      | 1633 |        | 1425         | 1479      | 1480 |        | 1432         | 1483      | 1483 |        |
|                        | 1488         | 1498      | 1515 |        | 1635          | 1649      | 1668 |        | 1488         | 1497      | 1530 |        | 1491         | 1501      | 1535 |        |
|                        | 1620         | 1661      | 3053 |        | 1790          | 1812      | 3203 |        | 1581         | 1624      | 3033 |        | 1589         | 1627      | 3028 |        |
|                        | 3057         | 3135      | 3144 |        | 3203          | 3256      | 3257 |        | 3034         | 3092      | 3093 |        | 3029         | 3079      | 3080 |        |
|                        | 3161         | 3171      | 3191 |        | 3282          | 3282      | 3342 |        | 3124         | 3125      | 3173 |        | 3111         | 3112      | 3166 |        |
|                        | 3197         | 3206      | 3222 |        | 3348          | 3359      | 3378 |        | 3185         | 3189      | 3197 |        | 3177         | 3180      | 3189 |        |
| <b>3-methyl benzyl</b> | 97           | 216       | 228  | 3.6854 | 51            | 201       | 212  | 3.7365 | 60           | 198       | 209  | 3.6744 | 57           | 197       | 208  | 3.6878 |
|                        | 285          | 413       | 453  | 1.8451 | 299           | 427       | 436  | 1.8694 | 282          | 407       | 423  | 1.8387 | 285          | 412       | 424  | 1.8457 |
|                        | 521          | 522       | 558  | 1.2391 | 538           | 538       | 547  | 1.2557 | 509          | 514       | 543  | 1.2348 | 510          | 519       | 541  | 1.2394 |
|                        | 579          | 711       | 755  |        | 569           | 681       | 730  |        | 546          | 689       | 724  |        | 550          | 690       | 731  |        |
|                        | 758          | 841       | 951  |        | 768           | 804       | 894  |        | 743          | 797       | 869  |        | 747          | 794       | 876  |        |
|                        | 962          | 980       | 982  |        | 908           | 973       | 1001 |        | 887          | 933       | 958  |        | 898          | 935       | 983  |        |
|                        | 994          | 1035      | 1061 |        | 1035          | 1048      | 1111 |        | 981          | 990       | 1039 |        | 984          | 995       | 1041 |        |
|                        | 1088         | 1154      | 1171 |        | 1151          | 1166      | 1248 |        | 1062         | 1119      | 1183 |        | 1065         | 1120      | 1184 |        |
|                        | 1216         | 1244      | 1282 |        | 1269          | 1362      | 1408 |        | 1198         | 1288      | 1327 |        | 1197         | 1289      | 1328 |        |
|                        | 1331         | 1397      | 1473 |        | 1450          | 1515      | 1567 |        | 1343         | 1414      | 1437 |        | 1348         | 1418      | 1442 |        |
|                        | 1477         | 1494      | 1510 |        | 1598          | 1631      | 1632 |        | 1485         | 1493      | 1495 |        | 1488         | 1497      | 1498 |        |
|                        | 1540         | 1682      | 1718 |        | 1640          | 1650      | 1683 |        | 1504         | 1576      | 1605 |        | 1509         | 1578      | 1607 |        |
|                        | 3064         | 3149      | 3169 |        | 3199          | 3249      | 3278 |        | 3030         | 3083      | 3115 |        | 3026         | 3072      | 3103 |        |
|                        | 3200         | 3206      | 3214 |        | 3329          | 3345      | 3349 |        | 3156         | 3162      | 3164 |        | 3147         | 3157      | 3158 |        |
|                        | 3226         | 3241      | 3318 |        | 3356          | 3374      | 3422 |        | 3175         | 3190      | 3253 |        | 3169         | 3183      | 3242 |        |
| <b>TS<sub>m</sub></b>  | 871 <i>i</i> | 33        | 45   | 1.9814 | 1562 <i>i</i> | 39        | 44   | 2.0156 | 326 <i>i</i> | 34        | 46   | 2.0084 | 505 <i>i</i> | 33        | 39   | 2.0286 |

|           |      |      |        |      |      |      |        |           |      |      |        |      |      |      |          |
|-----------|------|------|--------|------|------|------|--------|-----------|------|------|--------|------|------|------|----------|
| <b>86</b> | 202  | 237  | 0.4405 | 53   | 186  | 219  | 0.4289 | <b>47</b> | 196  | 215  | 0.4082 | 48   | 191  | 214  | 0.4090   |
| 281       | 408  | 415  | 0.4069 | 296  | 357  | 428  | 0.3976 | 279       | 403  | 432  | 0.3788 | 282  | 407  | 434  | 0.3794   |
| 456       | 497  | 529  |        | 442  | 523  | 542  |        | 492       | 508  | 521  | 0.3932 | 455  | 503  | 523  |          |
| 566       | 583  | 733  |        | 548  | 572  | 695  |        | 543       | 584  | 698  |        | 544  | 570  | 695  |          |
| 761       | 842  | 888  |        | 767  | 813  | 916  |        | 744       | 798  | 827  |        | 747  | 791  | 838  |          |
| 936       | 974  | 983  |        | 932  | 972  | 1004 |        | 864       | 889  | 914  |        | 880  | 901  | 923  |          |
| 1014      | 1018 | 1032 |        | 1022 | 1042 | 1058 |        | 938       | 970  | 993  |        | 942  | 995  | 999  |          |
| 1036      | 1089 | 1108 |        | 1107 | 1154 | 1171 |        | 1001      | 1040 | 1065 |        | 1009 | 1042 | 1069 |          |
| 1140      | 1169 | 1184 |        | 1215 | 1252 | 1266 |        | 1123      | 1183 | 1192 |        | 1125 | 1169 | 1194 |          |
| 1231      | 1252 | 1291 |        | 1303 | 1367 | 1405 |        | 1242      | 1324 | 1345 |        | 1218 | 1308 | 1336 |          |
| 1337      | 1400 | 1473 |        | 1455 | 1533 | 1569 |        | 1349      | 1416 | 1444 |        | 1353 | 1421 | 1449 |          |
| 1478      | 1481 | 1534 |        | 1608 | 1622 | 1631 |        | 1484      | 1487 | 1495 |        | 1487 | 1491 | 1499 |          |
| 1567      | 1740 | 1772 |        | 1643 | 1668 | 1698 |        | 1513      | 1584 | 1614 |        | 1519 | 1590 | 1618 |          |
| 3068      | 3149 | 3155 |        | 3203 | 3256 | 3283 |        | 3034      | 3089 | 3121 |        | 3030 | 3077 | 3108 |          |
| 3174      | 3210 | 3216 |        | 3295 | 3353 | 3357 |        | 3131      | 3170 | 3171 |        | 3123 | 3163 | 3165 |          |
| 3229      | 3246 | 3260 |        | 3364 | 3381 | 3383 |        | 3182      | 3198 | 3227 |        | 3175 | 3190 | 3214 |          |
|           |      |      |        |      |      |      |        |           |      |      | HBr    | 2620 |      |      | 250.2888 |
|           |      |      |        |      |      |      |        |           |      |      |        |      |      |      | 250.2888 |



**Table S3:** Calculated harmonic vibrational wavenumbers and rotational constants of the species involved in *p*-xylene + Br reaction. Imaginary wavenumber is denoted by *i*. Wavenumbers corresponding to the torsional modes are shown in bold.

| Species                    | MP2/aug-cc-pVDZ |           |      |        | G3          |      |      |        | G4          |           |      |           | B3LYP/cc-pVTZ |      |      |        |
|----------------------------|-----------------|-----------|------|--------|-------------|------|------|--------|-------------|-----------|------|-----------|---------------|------|------|--------|
|                            | Wavenumbers     |           |      | B(GHZ) | Wavenumbers |      |      | B(GHZ) | Wavenumbers |           |      | B(GHZ)    | Wavenumbers   |      |      | B(GHZ) |
| <i>p</i> -xylene           | <b>40</b>       | <b>48</b> | 138  | 5.2991 | 27          | 35   | 151  | 5.3876 | <b>25</b>   | <b>48</b> | 137  | 5.4100999 | 26            | 45   | 138  | 5.4361 |
|                            | 283             | 307       | 378  | 1.4129 | 304         | 337  | 413  | 1.4344 | 285         | 311       | 383  | 1.430163  | 287           | 311  | 388  | 1.4346 |
|                            | 400             | 452       | 478  | 1.1314 | 458         | 493  | 544  | 1.1490 | 416         | 462       | 502  | 1.1472284 | 420           | 465  | 500  | 1.1511 |
|                            | 621             | 638       | 728  |        | 706         | 774  | 780  |        | 655         | 725       | 729  |           | 661           | 726  | 731  |        |
|                            | 785             | 832       | 832  |        | 893         | 902  | 952  |        | 815         | 836       | 862  |           | 817           | 839  | 855  |        |
|                            | 893             | 932       | 986  |        | 1064        | 1068 | 1094 |        | 942         | 956       | 989  |           | 961           | 979  | 990  |        |
|                            | 1014            | 1021      | 1036 |        | 1112        | 1127 | 1172 |        | 1024        | 1036      | 1061 |           | 1025          | 1046 | 1065 |        |
|                            | 1048            | 1124      | 1191 |        | 1175        | 1195 | 1302 |        | 1064        | 1142      | 1209 |           | 1068          | 1144 | 1211 |        |
|                            | 1237            | 1241      | 1309 |        | 1311        | 1333 | 1338 |        | 1230        | 1239      | 1332 |           | 1223          | 1241 | 1325 |        |
|                            | 1395            | 1396      | 1406 |        | 1466        | 1567 | 1567 |        | 1336        | 1412      | 1413 |           | 1348          | 1417 | 1417 |        |
|                            | 1474            | 1476      | 1479 |        | 1570        | 1632 | 1632 |        | 1436        | 1486      | 1487 |           | 1441          | 1488 | 1489 |        |
|                            | 1482            | 1498      | 1526 |        | 1637        | 1646 | 1695 |        | 1489        | 1501      | 1549 |           | 1492          | 1505 | 1553 |        |
|                            | 1609            | 1653      | 3055 |        | 1775        | 1828 | 3200 |        | 1615        | 1658      | 3026 |           | 1617          | 1660 | 3023 |        |
|                            | 3055            | 3137      | 3137 |        | 3201        | 3251 | 3251 |        | 3026        | 3082      | 3083 |           | 3023          | 3068 | 3069 |        |
|                            | 3158            | 3158      | 3180 |        | 3278        | 3278 | 3338 |        | 3111        | 3111      | 3154 |           | 3100          | 3100 | 3147 |        |
|                            | 3186            | 3198      | 3204 |        | 3346        | 3359 | 3367 |        | 3156        | 3172      | 3175 |           | 3151          | 3164 | 3169 |        |
| <b>4-methyl benzyl</b>     | 59              | 146       | 299  | 5.4274 | 19          | 135  | 303  | 5.5070 | 34          | 133       | 293  | 5.4060264 | 33            | 131  | 296  | 5.4269 |
|                            | 330             | 393       | 425  | 1.5115 | 313         | 395  | 417  | 1.5313 | 303         | 386       | 392  | 1.5077041 | 300           | 391  | 397  | 1.5132 |
|                            | 473             | 521       | 529  | 1.1911 | 483         | 505  | 543  | 1.2072 | 464         | 501       | 512  | 1.1876214 | 467           | 497  | 514  | 1.1920 |
|                            | 658             | 706       | 751  |        | 676         | 697  | 733  |        | 646         | 697       | 733  |           | 652           | 707  | 737  |        |
|                            | 759             | 873       | 896  |        | 782         | 842  | 845  |        | 750         | 830       | 837  |           | 752           | 832  | 834  |        |
|                            | 923             | 978       | 1014 |        | 857         | 980  | 990  |        | 844         | 940       | 959  |           | 846           | 967  | 969  |        |
|                            | 1032            | 1033      | 1073 |        | 1035        | 1074 | 1093 |        | 968         | 1013      | 1013 |           | 977           | 1015 | 1021 |        |
|                            | 1080            | 1148      | 1168 |        | 1145        | 1209 | 1256 |        | 1054        | 1147      | 1185 |           | 1058          | 1151 | 1184 |        |
|                            | 1245            | 1273      | 1278 |        | 1284        | 1358 | 1400 |        | 1238        | 1296      | 1322 |           | 1237          | 1296 | 1315 |        |
|                            | 1336            | 1398      | 1475 |        | 1440        | 1531 | 1567 |        | 1332        | 1412      | 1446 |           | 1343          | 1416 | 1452 |        |
|                            | 1476            | 1495      | 1512 |        | 1613        | 1622 | 1634 |        | 1485        | 1488      | 1494 |           | 1488          | 1491 | 1497 |        |
|                            | 1545            | 1674      | 1716 |        | 1637        | 1645 | 1677 |        | 1513        | 1556      | 1610 |           | 1518          | 1559 | 1611 |        |
|                            | 3059            | 3139      | 3166 |        | 3194        | 3249 | 3274 |        | 3019        | 3078      | 3110 |           | 3013          | 3067 | 3098 |        |
|                            | 3200            | 3205      | 3209 |        | 3329        | 3344 | 3345 |        | 3156        | 3159      | 3160 |           | 3147          | 3153 | 3154 |        |
|                            | 3227            | 3229      | 3318 |        | 3363        | 3366 | 3422 |        | 3178        | 3181      | 3253 |           | 3172          | 3175 | 3242 |        |
| <b>2,5-dimethyl phenyl</b> | 75              | 93        | 156  | 5.8894 | 18          | 42   | 137  | 5.9641 | 28          | 52        | 134  | 5.7776134 | 34            | 54   | 133  | 5.8066 |

|                       |           |           |            |        |       |      |      |        |           |      |           |             |      |      |      |        |
|-----------------------|-----------|-----------|------------|--------|-------|------|------|--------|-----------|------|-----------|-------------|------|------|------|--------|
|                       | 285       | 350       | 391        | 1.4388 | 295   | 307  | 403  | 1.4590 | 277       | 302  | 378       | 1.4252907   | 279  | 300  | 383  | 1.4303 |
|                       | 471       | 490       | 590        | 1.1735 | 425   | 475  | 522  | 1.1896 | 420       | 454  | 519       | 1.159672    | 422  | 456  | 517  | 1.1641 |
|                       | 680       | 744       | 767        |        | 678   | 701  | 766  |        | 649       | 691  | 730       |             | 655  | 689  | 730  |        |
|                       | 864       | 920       | 977        |        | 840   | 853  | 890  |        | 826       | 829  | 867       |             | 822  | 831  | 861  |        |
|                       | 1001      | 1030      | 1048       |        | 994   | 1050 | 1080 |        | 945       | 980  | 1013      |             | 958  | 982  | 1018 |        |
|                       | 1066      | 1111      | 1124       |        | 1107  | 1148 | 1152 |        | 1024      | 1057 | 1062      |             | 1027 | 1060 | 1065 |        |
|                       | 1140      | 1212      | 1234       |        | 1219  | 1263 | 1297 |        | 1157      | 1209 | 1231      |             | 1160 | 1210 | 1228 |        |
|                       | 1299      | 1311      | 1395       |        | 1370  | 1382 | 1502 |        | 1280      | 1316 | 1410      |             | 1282 | 1309 | 1414 |        |
|                       | 1401      | 1470      | 1476       |        | 1558  | 1567 | 1574 |        | 1410      | 1412 | 1479      |             | 1415 | 1416 | 1480 |        |
|                       | 1478      | 1486      | 1527       |        | 1626  | 1630 | 1633 |        | 1482      | 1485 | 1497      |             | 1485 | 1488 | 1499 |        |
|                       | 1606      | 1818      | 1894       |        | 1642  | 1648 | 1691 |        | 1503      | 1565 | 1645      |             | 1506 | 1566 | 1644 |        |
|                       | 3068      | 3071      | 3154       |        | 3198  | 3204 | 3252 |        | 3029      | 3035 | 3083      |             | 3024 | 3031 | 3073 |        |
|                       | 3160      | 3172      | 3172       |        | 3257  | 3277 | 3278 |        | 3091      | 3113 | 3116      |             | 3080 | 3102 | 3104 |        |
|                       | 3198      | 3224      | 3228       |        | 3344  | 3356 | 3364 |        | 3151      | 3163 | 3176      |             | 3145 | 3153 | 3169 |        |
| <b>TS<sub>p</sub></b> | 800i      | 36        | 43         | 2.4788 | 1554i | 19   | 43   | 2.5021 | 296i      | 25   | 36        | 2.5228284   | 485i | 37   | 38   | 2.5534 |
|                       | <b>59</b> | 135       | 298        | 0.3919 | 53    | 129  | 285  | 0.3839 | <b>50</b> | 125  | 293       | 0.3652446   | 50   | 125  | 296  | 0.3655 |
|                       | 331       | 389       | 423        | 0.3853 | 310   | 372  | 407  | 0.3775 | 309       | 383  | 401       | 0.3609453   | 306  | 389  | 405  | 0.3616 |
|                       | 438       | 488       | 490        |        | 416   | 490  | 518  |        | 455       | 507  | 511       | 0.363088587 | 439  | 502  | 505  |        |
|                       | 547       | 663       | 747        |        | 523   | 679  | 716  |        | 562       | 645  | 723       |             | 512  | 652  | 725  |        |
|                       | 756       | 848       | 893        |        | 779   | 844  | 857  |        | 757       | 813  | 837       |             | 755  | 813  | 835  |        |
|                       | 928       | 935       | 958        |        | 866   | 986  | 1010 |        | 838       | 853  | 872       |             | 844  | 864  | 894  |        |
|                       | 999       | 1033      | 1048       |        | 1011  | 1045 | 1088 |        | 952       | 970  | 982       |             | 977  | 985  | 989  |        |
|                       | 1064      | 1090      | 1112       |        | 1097  | 1150 | 1200 |        | 1019      | 1021 | 1055      |             | 1024 | 1032 | 1060 |        |
|                       | 1137      | 1152      | 1209       |        | 1224  | 1267 | 1268 |        | 1149      | 1188 | 1235      |             | 1154 | 1173 | 1208 |        |
|                       | 1247      | 1274      | 1293       |        | 1303  | 1363 | 1398 |        | 1239      | 1330 | 1339      |             | 1238 | 1315 | 1327 |        |
|                       | 1342      | 1398      | 1476       |        | 1450  | 1538 | 1568 |        | 1351      | 1411 | 1448      |             | 1349 | 1417 | 1455 |        |
|                       | 1476      | 1478      | 1530       |        | 1619  | 1625 | 1634 |        | 1486      | 1486 | 1487      |             | 1485 | 1491 | 1494 |        |
|                       | 1577      | 1740      | 1770       |        | 1647  | 1651 | 1696 |        | 1528      | 1565 | 1617      |             | 1534 | 1571 | 1622 |        |
|                       | 3066      | 3149      | 3151       |        | 3199  | 3257 | 3282 |        | 3025      | 3086 | 3119      |             | 3024 | 3069 | 3108 |        |
|                       | 3176      | 3212      | 3217       |        | 3295  | 3354 | 3355 |        | 3132      | 3169 | 3169      |             | 3123 | 3161 | 3164 |        |
|                       | 3231      | 3234      | 3259       |        | 3371  | 3374 | 3381 |        | 3186      | 3189 | 3227      |             | 3179 | 3182 | 3214 |        |
| <b>RC<sub>p</sub></b> | 59        | <b>76</b> | <b>126</b> | 1.5890 | 7     | 19   | 23   | 1.5556 | <b>47</b> | 58   | <b>63</b> | 1.4184472   | 43   | 55   | 60   | 1.4139 |
|                       | 135       | 143       | 197        | 0.7743 | 32    | 36   | 152  | 0.7670 | 78        | 120  | 156       | 0.7673933   | 69   | 115  | 152  | 0.7603 |
|                       | 286       | 317       | 381        | 0.6275 | 304   | 337  | 413  | 0.6169 | 285       | 313  | 381       | 0.5637961   | 287  | 312  | 387  | 0.5586 |
|                       | 400       | 452       | 525        |        | 459   | 493  | 545  |        | 407       | 455  | 500       |             | 411  | 458  | 499  |        |
|                       | 630       | 674       | 727        |        | 706   | 774  | 780  |        | 645       | 694  | 729       |             | 651  | 699  | 730  |        |
|                       | 805       | 830       | 856        |        | 893   | 904  | 954  |        | 822       | 830  | 875       |             | 824  | 833  | 870  |        |
|                       | 922       | 954       | 986        |        | 1065  | 1069 | 1097 |        | 947       | 966  | 985       |             | 953  | 986  | 989  |        |
|                       | 1015      | 1020      | 1037       |        | 1112  | 1127 | 1173 |        | 1023      | 1034 | 1058      |             | 1026 | 1042 | 1062 |        |
|                       | 1067      | 1126      | 1193       |        | 1176  | 1195 | 1302 |        | 1065      | 1137 | 1201      |             | 1069 | 1141 | 1203 |        |

|                       |      |      |      |        |      |      |      |        |      |      |      |           |      |      |      |        |
|-----------------------|------|------|------|--------|------|------|------|--------|------|------|------|-----------|------|------|------|--------|
|                       | 1237 | 1241 | 1310 |        | 1311 | 1332 | 1339 |        | 1218 | 1240 | 1336 |           | 1216 | 1244 | 1333 |        |
|                       | 1395 | 1397 | 1408 |        | 1466 | 1565 | 1567 |        | 1340 | 1407 | 1414 |           | 1349 | 1413 | 1418 |        |
|                       | 1472 | 1473 | 1476 |        | 1570 | 1632 | 1632 |        | 1419 | 1479 | 1484 |           | 1427 | 1483 | 1487 |        |
|                       | 1488 | 1501 | 1523 |        | 1636 | 1646 | 1694 |        | 1486 | 1497 | 1533 |           | 1490 | 1500 | 1541 |        |
|                       | 1594 | 1682 | 3057 |        | 1772 | 1825 | 3202 |        | 1579 | 1630 | 3033 |           | 1584 | 1634 | 3027 |        |
|                       | 3057 | 3139 | 3144 |        | 3202 | 3253 | 3254 |        | 3033 | 3089 | 3091 |           | 3028 | 3077 | 3077 |        |
|                       | 3163 | 3172 | 3189 |        | 3279 | 3280 | 3341 |        | 3120 | 3123 | 3166 |           | 3107 | 3110 | 3158 |        |
|                       | 3199 | 3208 | 3215 |        | 3348 | 3361 | 3368 |        | 3184 | 3186 | 3204 |           | 3177 | 3178 | 3195 |        |
| <b>PC<sub>p</sub></b> | 27   | 46   | 58   | 1.1942 | 13   | 17   | 23   | 1.2072 | 18   | 21   | 33   | 1.2341088 | 15   | 22   | 33   | 1.2336 |
|                       | 78   | 148  | 172  | 0.7538 | 36   | 119  | 121  | 0.7117 | 67   | 135  | 293  | 0.5806185 | 53   | 132  | 257  | 0.5568 |
|                       | 255  | 299  | 333  | 0.5546 | 137  | 305  | 313  | 0.5324 | 301  | 317  | 324  | 0.4479453 | 294  | 300  | 303  | 0.4345 |
|                       | 393  | 419  | 473  |        | 397  | 417  | 483  |        | 387  | 393  | 464  |           | 392  | 397  | 467  |        |
|                       | 510  | 529  | 657  |        | 507  | 541  | 676  |        | 503  | 513  | 645  |           | 499  | 514  | 651  |        |
|                       | 706  | 749  | 756  |        | 699  | 738  | 782  |        | 704  | 739  | 750  |           | 711  | 743  | 752  |        |
|                       | 875  | 905  | 937  |        | 847  | 852  | 857  |        | 835  | 842  | 847  |           | 837  | 840  | 845  |        |
|                       | 979  | 1016 | 1033 |        | 985  | 997  | 1035 |        | 950  | 963  | 968  |           | 969  | 971  | 984  |        |
|                       | 1046 | 1078 | 1091 |        | 1074 | 1093 | 1146 |        | 1012 | 1014 | 1055 |           | 1015 | 1020 | 1058 |        |
|                       | 1149 | 1168 | 1246 |        | 1209 | 1256 | 1284 |        | 1146 | 1185 | 1237 |           | 1150 | 1185 | 1237 |        |
|                       | 1272 | 1277 | 1336 |        | 1358 | 1397 | 1440 |        | 1297 | 1322 | 1333 |           | 1297 | 1315 | 1344 |        |
|                       | 1399 | 1473 | 1476 |        | 1530 | 1568 | 1612 |        | 1412 | 1444 | 1485 |           | 1416 | 1451 | 1488 |        |
|                       | 1494 | 1512 | 1547 |        | 1622 | 1633 | 1636 |        | 1487 | 1495 | 1512 |           | 1490 | 1499 | 1518 |        |
|                       | 1679 | 1720 | 2583 |        | 1645 | 1677 | 2807 |        | 1553 | 1606 | 2509 |           | 1557 | 1609 | 2546 |        |
|                       | 3059 | 3140 | 3168 |        | 3196 | 3252 | 3278 |        | 3023 | 3082 | 3113 |           | 3017 | 3070 | 3101 |        |
|                       | 3202 | 3206 | 3213 |        | 3331 | 3348 | 3349 |        | 3158 | 3162 | 3164 |           | 3150 | 3155 | 3157 |        |
|                       | 3227 | 3232 | 3322 |        | 3366 | 3369 | 3425 |        | 3180 | 3184 | 3257 |           | 3173 | 3177 | 3245 |        |

**Table S4** Optimized geometries in cartesian coordinates (Å) of various species involved in the reaction of *o*-xylene + Br.

| Species             | MP2/aug-cc-pVDZ |              |              | B3LYP/cc-pVTZ |              |              |              |
|---------------------|-----------------|--------------|--------------|---------------|--------------|--------------|--------------|
| <i>o</i> -xylene    | C               | -0.632046294 | -0.534212122 | -0.206662932  | -0.618665521 | -0.513546829 | -0.203515161 |
|                     | C               | -0.988467689 | 0.476226111  | -1.116979503  | -0.969481005 | 0.482964779  | -1.10237351  |
|                     | C               | -0.32856555  | 1.718033533  | -1.067886554  | -0.317412393 | 1.709396957  | -1.053491723 |
|                     | C               | 0.685982058  | 1.972318652  | -0.122410999  | 0.685293413  | 1.965243443  | -0.119786786 |
|                     | C               | 1.045836326  | 0.95213564   | 0.796680086   | 1.040985811  | 0.954835943  | 0.791422108  |
|                     | C               | 0.379417222  | -0.289074897 | 0.740340813   | 0.379645484  | -0.270667883 | 0.732451344  |
|                     | H               | -1.772928984 | 0.300721877  | -1.85913365   | -1.744618174 | 0.310461968  | -1.837244134 |
|                     | H               | -0.60463824  | 2.506832815  | -1.776219554  | -0.591503856 | 2.487461761  | -1.755492681 |
|                     | C               | 1.383132933  | 3.313904464  | -0.086156703  | 1.371258379  | 3.305975835  | -0.095738344 |
|                     | H               | 1.251139748  | 3.806618404  | 0.892053079   | 1.249626897  | 3.804618208  | 0.868985022  |
|                     | H               | 2.468317754  | 3.20503631   | -0.252304373  | 2.44654577   | 3.212600019  | -0.266622839 |
|                     | H               | 0.983893238  | 3.983334782  | -0.86271815   | 0.968583621  | 3.964679359  | -0.863724    |
|                     | H               | -1.135997926 | -1.504957184 | -0.232375046  | -1.116369259 | -1.473939978 | -0.227548078 |
|                     | H               | 0.658790876  | -1.074937688 | 1.450641781   | 0.653467835  | -1.048741614 | 1.434593639  |
|                     | C               | 2.130326084  | 1.195608065  | 1.82224943    | 2.11859027   | 1.183239354  | 1.818769506  |
|                     | H               | 1.873679384  | 2.041595396  | 2.482189762   | 1.877050303  | 2.020853977  | 2.477622496  |
| H                   | 3.090896895     | 1.440047152  | 1.337856512  | 3.077876896   | 1.41887464   | 1.351448934  |              |
| H                   | 2.281286486     | 0.305294059  | 2.450842289  | 2.25917985    | 0.30021543   | 2.440250495  |              |
| 3,4-dimethyl phenyl | C               | -0.447384782 | -0.694165794 | 0.58611558    | -0.453188193 | -0.701509481 | 0.584834476  |
|                     | C               | -0.724796796 | 0.330615567  | -0.260867808  | -0.728861924 | 0.330081817  | -0.269250648 |
|                     | C               | -0.094540277 | 1.54413535   | -0.265542941  | -0.09840365  | 1.545777822  | -0.276318739 |
|                     | C               | 0.906581091  | 1.755144202  | 0.661963418   | 0.917968897  | 1.769010839  | 0.663676104  |
|                     | C               | 1.238607685  | 0.742313057  | 1.559289487   | 1.247805334  | 0.744175967  | 1.570246432  |
|                     | C               | 0.561822486  | -0.456214345 | 1.507346537   | 0.561800384  | -0.468753627 | 1.518337497  |
|                     | H               | -0.36599816  | 2.3293488    | -0.975827893  | -0.364274094 | 2.324370242  | -0.98058861  |
|                     | C               | 1.637683536  | 3.07954183   | 0.701952914   | 1.636490005  | 3.092365536  | 0.689143529  |
|                     | H               | 1.519527021  | 3.563161014  | 1.685463648   | 1.527656697  | 3.589682486  | 1.655924645  |
|                     | H               | 2.717804048  | 2.936419449  | 0.534622614   | 2.70849854   | 2.970573662  | 0.516520941  |
|                     | H               | 1.254226881  | 3.762420776  | -0.069203813  | 1.249347744  | 3.762726662  | -0.076480582 |
|                     | H               | -0.976616328 | -1.648226262 | 0.554655593   | -0.977731822 | -1.64708115  | 0.555323019  |
|                     | H               | 0.828751461  | -1.24758129  | 2.216277977   | 0.821706108  | -1.25268262  | 2.220203115  |
|                     | C               | 2.334288314  | 0.960449842  | 2.58134032    | 2.334798483  | 0.947255347  | 2.59460902   |
|                     | H               | 2.09928106   | 1.809919512  | 3.243906511   | 2.115082049  | 1.789597937  | 3.254821103  |
|                     | H               | 3.297531375  | 1.183187119  | 2.093108891   | 3.298091651  | 1.15922341   | 2.124432782  |
| H                   | 2.466563816     | 0.065592596  | 3.206419696  | 2.456546222   | 0.06124657   | 3.215586646  |              |
| 2,3-dimethyl phenyl | C               | -0.422671775 | -0.67388737  | 0.596741602   | -0.428974726 | -0.686702876 | 0.597737114  |
|                     | C               | -0.771677569 | 0.317414618  | -0.292652393  | -0.775845725 | 0.321427009  | -0.303264446 |
|                     | C               | -0.067025364 | 1.484154221  | -0.185087885  | -0.068101347 | 1.489406851  | -0.195012311 |
|                     | C               | 0.931194565  | 1.767925114  | 0.696773653   | 0.937023795  | 1.780080404  | 0.693023826  |
|                     | C               | 1.259681066  | 0.742816762  | 1.582953857   | 1.272421257  | 0.74539095   | 1.596602888  |
|                     | C               | 0.582411829  | -0.456498924 | 1.521088272   | 0.58122759   | -0.46466516  | 1.527781221  |
|                     | C               | 1.64126905   | 3.103645388  | 0.719905128   | 1.636591327  | 3.114349001  | 0.70380542   |
|                     | H               | 1.522355799  | 3.594420611  | 1.699681974   | 1.525411006  | 3.615147176  | 1.668284809  |
|                     | H               | 2.721506846  | 2.9770114    | 0.540981315   | 2.708281745  | 3.004334854  | 0.522875975  |
|                     | H               | 1.234965364  | 3.767935703  | -0.054548597  | 1.229434291  | 3.767356932  | -0.065033962 |
|                     | H               | -0.942402941 | -1.63635492  | 0.571709534   | -0.945586537 | -1.637862725 | 0.571918248  |
|                     | H               | 0.849053727  | -1.252966742 | 2.221435223   | 0.841852793  | -1.25354506  | 2.222064031  |
|                     | C               | 2.356769717  | 0.959054426  | 2.603120871   | 2.360195347  | 0.947387314  | 2.618889909  |
|                     | H               | 2.116451316  | 1.807211876  | 3.264929871   | 2.136431086  | 1.785586745  | 3.282879345  |

|                        |                       |              |              |              |              |              |              |
|------------------------|-----------------------|--------------|--------------|--------------|--------------|--------------|--------------|
|                        | H                     | 3.313935674  | 1.190671496  | 2.107841246  | 3.320007785  | 1.168106902  | 2.145860914  |
|                        | H                     | 2.494851493  | 0.062409258  | 3.223791021  | 2.487177478  | 0.057742858  | 3.23380032   |
|                        | H                     | -1.560353227 | 0.176948355  | -1.03401487  | -1.557231594 | 0.178370095  | -1.03756348  |
| <b>PC<sub>o</sub></b>  | C                     | 0.013292325  | 0.257061965  | -1.635687179 | 0.161992715  | 0.210821846  | -1.662772553 |
|                        | C                     | -0.426617619 | 1.278249059  | -0.794125093 | -0.227396518 | 1.137255158  | -0.691929054 |
|                        | C                     | 0.448837539  | 2.307271698  | -0.445594214 | 0.62823051   | 2.190995393  | -0.359902725 |
|                        | C                     | 1.745630929  | 2.349998324  | -0.907356584 | 1.864471014  | 2.35176513   | -0.964113679 |
|                        | C                     | 2.204311425  | 1.316906388  | -1.775253229 | 2.276308037  | 1.406897809  | -1.962026103 |
|                        | C                     | 1.30232062   | 0.278708108  | -2.117160702 | 1.385166643  | 0.343504318  | -2.28186672  |
|                        | H                     | -1.445255006 | 1.269870221  | -0.400409018 | -1.190642887 | 1.050399604  | -0.207781789 |
|                        | H                     | 0.101323224  | 3.097431688  | 0.226477798  | 0.316865221  | 2.90580114   | 0.3917383    |
|                        | C                     | 2.676070648  | 3.460107352  | -0.483107297 | 2.754310423  | 3.498963209  | -0.576136872 |
|                        | H                     | 3.54411829   | 3.053211278  | 0.061851419  | 3.709951145  | 3.148993857  | -0.178719013 |
|                        | H                     | 3.05748777   | 4.015278697  | -1.355675613 | 2.980556883  | 4.13888706   | -1.432250735 |
|                        | H                     | 2.155677271  | 4.16813155   | 0.177423506  | 2.281194323  | 4.115139699  | 0.186474866  |
|                        | H                     | 1.629358749  | -0.163782368 | 0.22826655   | 0.925777329  | -0.206238401 | 1.134853742  |
|                        | H                     | 1.655469504  | -0.523260944 | -2.7721384   | 1.691279723  | -0.372497804 | -3.033761694 |
|                        | Br                    | 2.244431589  | -0.54671308  | 1.463032832  | 1.309542872  | -0.982250151 | 2.275478769  |
|                        | H                     | -0.659039341 | -0.560533124 | -1.906838752 | -0.494644456 | -0.607020898 | -1.92754105  |
|                        | C                     | 3.5298002    | 1.290276503  | -2.278617562 | 3.508506222  | 1.499619711  | -2.61730635  |
|                        | H                     | 4.258149849  | 2.060304957  | -2.030722601 | 4.215575933  | 2.286085618  | -2.407453358 |
|                        | H                     | 3.847764105  | 0.477128948  | -2.932267791 | 3.786086939  | 0.768524922  | -3.362885912 |
|                        | <b>RC<sub>o</sub></b> | C            | -0.132684763 | -0.235660258 | -0.322916587 | -0.181209902 | -0.219792968 |
| C                      |                       | -0.727132756 | 0.985051081  | -0.757271045 | -0.744530856 | 0.978883667  | -0.813683146 |
| C                      |                       | 0.047334806  | 2.155416426  | -0.759495676 | 0.02751685   | 2.142056082  | -0.776917456 |
| C                      |                       | 1.398164742  | 2.15126147   | -0.34351099  | 1.33807822   | 2.149621541  | -0.299282634 |
| C                      |                       | 1.989424754  | 0.961382413  | 0.095513914  | 1.898763724  | 0.976298369  | 0.158181756  |
| C                      |                       | 1.22346338   | -0.225644821 | 0.110593161  | 1.138698796  | -0.205286098 | 0.135337982  |
| H                      |                       | -0.409986284 | 3.093889558  | -1.090582392 | -0.410497721 | 3.067938237  | -1.128754707 |
| C                      |                       | -0.892984949 | -1.536342201 | -0.418163286 | -0.952860724 | -1.506790121 | -0.389176963 |
| H                      |                       | -0.329811076 | -2.352620869 | 0.057005046  | -0.359903164 | -2.330620582 | 0.001772982  |
| H                      |                       | -1.066836037 | -1.798534821 | -1.476062079 | -1.26439769  | -1.759278095 | -1.405719526 |
| H                      |                       | -1.873133081 | -1.462743803 | 0.077831863  | -1.860551747 | -1.435307139 | 0.213567802  |
| H                      |                       | 1.686163611  | -1.17114533  | 0.411326759  | 1.609222458  | -1.142971175 | 0.393652886  |
| Br                     |                       | -0.245881311 | -0.014334107 | 2.449738303  | 0.522748146  | -0.235391497 | 2.84300184   |
| H                      |                       | 1.975380339  | 3.080344612  | -0.359468987 | 1.902588865  | 3.071596049  | -0.285560449 |
| H                      |                       | 3.029437376  | 0.944485686  | 0.432324442  | 2.909989964  | 0.952161838  | 0.538164514  |
| C                      |                       | -2.177888332 | 1.010980063  | -1.172974509 | -2.157699196 | 1.025311958  | -1.328985366 |
| H                      |                       | -2.8260212   | 0.744343025  | -0.320360232 | -2.870551656 | 0.719634058  | -0.559817962 |
| H                      |                       | -2.379974425 | 0.288137159  | -1.980693265 | -2.300160221 | 0.352340101  | -2.177379334 |
| H                      |                       | -2.466047114 | 2.012583195  | -1.524789238 | -2.424256465 | 2.030444256  | -1.651054828 |
| <b>2-methyl benzyl</b> |                       | C            | -0.368749552 | -0.715015758 | 0.572270435  | -0.367940206 | -0.714975723 |
|                        | C                     | -0.722319522 | 0.300204326  | -0.315405102 | -0.721839811 | 0.300869824  | -0.315960292 |
|                        | C                     | -0.111146297 | 1.527545447  | -0.223929662 | -0.110679488 | 1.531971846  | -0.226153097 |
|                        | C                     | 0.878011727  | 1.793467956  | 0.756557897  | 0.882985689  | 1.805823501  | 0.756068517  |
|                        | C                     | 1.231737998  | 0.746683786  | 1.659653202  | 1.236630792  | 0.752354396  | 1.663077495  |
|                        | C                     | 0.603579696  | -0.472943235 | 1.545417372  | 0.602900032  | -0.473599088 | 1.545959173  |
|                        | C                     | 1.483291656  | 3.072132622  | 0.816615401  | 1.476814648  | 3.071245302  | 0.809118398  |
|                        | H                     | 2.246329918  | 3.31778033   | 1.553376045  | 2.233432571  | 3.324348192  | 1.534670398  |
|                        | H                     | 1.188102953  | 3.848812658  | 0.109781484  | 1.184610213  | 3.840648816  | 0.108888124  |
|                        | H                     | -0.846974024 | -1.695151174 | 0.510270242  | -0.841447599 | -1.685372559 | 0.511329082  |
|                        | H                     | 0.875647819  | -1.274860885 | 2.238497134  | 0.871123592  | -1.267676982 | 2.232122306  |
|                        | C                     | 2.279425986  | 0.97625472   | 2.723378516  | 2.277602694  | 0.969571333  | 2.725444728  |
|                        | H                     | 1.984342674  | 1.795057072  | 3.40018133   | 1.999045075  | 1.781435258  | 3.401610168  |
|                        | H                     | 3.247988979  | 1.249830112  | 2.273248631  | 3.245105921  | 1.235047502  | 2.292370672  |

|                 |    |              |              |              |              |              |              |
|-----------------|----|--------------|--------------|--------------|--------------|--------------|--------------|
|                 | H  | 2.423488598  | 0.067110325  | 3.324769611  | 2.414877162  | 0.069577226  | 3.322696029  |
|                 | H  | -1.481803181 | 0.121422305  | -1.080515917 | -1.473620555 | 0.122900952  | -1.073467872 |
|                 | H  | -0.383597058 | 2.328830323  | -0.917123628 | -0.38224236  | 2.322991134  | -0.913746881 |
| TS <sub>o</sub> | C  | -0.803125725 | -0.476378981 | -0.075511095 | -0.818809828 | -0.490005094 | -0.062924942 |
|                 | C  | -1.181313347 | 0.512336123  | -0.97273915  | -1.159412559 | 0.501652798  | -0.98174312  |
|                 | C  | -0.572719937 | 1.742447473  | -0.908304263 | -0.536213447 | 1.729647446  | -0.916350991 |
|                 | C  | 0.407117995  | 2.017803033  | 0.054980241  | 0.438780281  | 2.011862294  | 0.070127289  |
|                 | C  | 0.800542368  | 1.003536097  | 0.953756849  | 0.792721017  | 0.986961436  | 0.996731401  |
|                 | C  | 0.180973709  | -0.223234562 | 0.872898598  | 0.147533194  | -0.237960358 | 0.908757198  |
|                 | H  | -1.950049727 | 0.313606163  | -1.722683823 | -1.905513417 | 0.309536488  | -1.740526589 |
|                 | H  | -0.85637216  | 2.532438318  | -1.609911194 | -0.791176887 | 2.505572486  | -1.626554869 |
|                 | C  | 1.037098492  | 3.321233939  | 0.081262347  | 1.062368996  | 3.292169487  | 0.088287416  |
|                 | H  | 1.505545027  | 3.674930232  | 1.004371608  | 1.601588064  | 3.621089603  | 0.965844735  |
|                 | H  | 2.291531229  | 3.058813846  | -0.614402233 | 2.343211734  | 3.138522726  | -0.772332556 |
|                 | H  | 0.622179443  | 4.100053975  | -0.567298181 | 0.632360145  | 4.080341549  | -0.51701055  |
|                 | H  | -1.274929876 | -1.461387889 | -0.115465358 | -1.299424286 | -1.458102721 | -0.10450395  |
|                 | H  | 0.47689927   | -1.017042425 | 1.564544182  | 0.407535286  | -1.018853208 | 1.611968923  |
|                 | C  | 1.894276145  | 1.2558523    | 1.96442073   | 1.847261235  | 1.216098802  | 2.043185463  |
|                 | H  | 1.607738314  | 2.056605759  | 2.665908264  | 1.577612491  | 2.034176814  | 2.71526888   |
|                 | H  | 2.822568387  | 1.565858519  | 1.457379615  | 2.807482491  | 1.474139466  | 1.591948591  |
|                 | H  | 2.099359095  | 0.346311544  | 2.546362232  | 1.990446752  | 0.322861617  | 2.6482871    |
|                 | Br | 3.707704456  | 2.812742588  | -1.263841019 | 3.676671898  | 3.11681442   | -1.602731079 |

**Table S5** Optimized geometries in cartesian coordinates ( $\text{\AA}$ ) of various species involved in the reaction of *m*-xylene + Br.

| Species             |         | MP2/aug-cc-pVDZ |          |          | B3LYP/cc-pVTZ |          |          |
|---------------------|---------|-----------------|----------|----------|---------------|----------|----------|
| <i>m</i> -xylene    | C       | -0.59379        | -0.54352 | -0.22015 | -0.54092      | -0.55226 | -0.25777 |
|                     | C       | -0.85092        | 0.41735  | -1.21464 | -0.81600      | 0.41086  | -1.22139 |
|                     | C       | -0.20084        | 1.66411  | -1.17778 | -0.21547      | 1.66036  | -1.15550 |
|                     | C       | 0.71356         | 1.96444  | -0.14649 | 0.67427       | 1.96409  | -0.12386 |
|                     | C       | 0.95720         | 0.98714  | 0.84086  | 0.93432       | 0.98645  | 0.83433  |
|                     | C       | 0.31601         | -0.26899 | 0.82233  | 0.33780       | -0.27454 | 0.78765  |
|                     | H       | -1.55866        | 0.19432  | -2.01919 | -1.50243      | 0.18501  | -2.02719 |
|                     | H       | -0.40488        | 2.40887  | -1.95499 | -0.43640      | 2.40548  | -1.90984 |
|                     | H       | 1.66636         | 1.21062  | 1.64705  | 1.62213       | 1.21242  | 1.64182  |
|                     | C       | 1.41265         | 3.30675  | -0.10797 | 1.35701       | 3.30626  | -0.06489 |
|                     | H       | 2.08878         | 3.37651  | 0.75759  | 1.68372       | 3.54342  | 0.94738  |
|                     | H       | 2.00907         | 3.46698  | -1.02111 | 2.24149       | 3.32593  | -0.70713 |
|                     | H       | 0.68248         | 4.12968  | -0.03826 | 0.69500       | 4.10413  | -0.40290 |
|                     | H       | -1.10297        | -1.51303 | -0.25374 | -1.01329      | -1.52491 | -0.31725 |
|                     | C       | 0.59189         | -1.30406 | 1.89216  | 0.61953       | -1.29652 | 1.85871  |
|                     | H       | -0.33163        | -1.56739 | 2.43344  | 0.00225       | -1.11927 | 2.74337  |
|                     | H       | 1.32239         | -0.93054 | 2.62568  | 1.66117       | -1.26104 | 2.17973  |
|                     | H       | 0.99460         | -2.23018 | 1.45018  | 0.40713       | -2.30679 | 1.50968  |
| 3,5-dimethyl phenyl | C       | -0.46062        | -0.28085 | -0.37741 | -0.53710      | -0.25339 | -0.33156 |
|                     | C       | -0.69610        | 0.68694  | -1.30619 | -0.78585      | 0.72295  | -1.25914 |
|                     | C       | -0.13299        | 1.92608  | -1.35275 | -0.18789      | 1.95077  | -1.32487 |
|                     | C       | 0.77134         | 2.22684  | -0.34956 | 0.77866       | 2.24135  | -0.34745 |
|                     | C       | 1.04674         | 1.27912  | 0.61917  | 1.06227       | 1.27386  | 0.61584  |
|                     | C       | 0.44574         | 0.03362  | 0.61972  | 0.42857       | 0.02930  | 0.64552  |
|                     | H       | -0.37536        | 2.64971  | -2.13485 | -0.44005      | 2.67887  | -2.08586 |
|                     | H       | 1.76278         | 1.52241  | 1.41021  | 1.80267       | 1.49784  | 1.37475  |
|                     | C       | 1.44876         | 3.58284  | -0.31964 | 1.49077       | 3.56968  | -0.35555 |
|                     | H       | 2.13450         | 3.66254  | 0.53580  | 2.10300       | 3.69669  | 0.53634  |
|                     | H       | 2.02416         | 3.74613  | -1.24379 | 2.14582       | 3.65872  | -1.22521 |
|                     | H       | 0.69967         | 4.38570  | -0.24165 | 0.78229       | 4.39854  | -0.39991 |
|                     | H       | -0.95502        | -1.25482 | -0.40925 | -1.05625      | -1.20360 | -0.33650 |
|                     | C       | 0.77113         | -0.98166 | 1.69763  | 0.78876       | -0.99889 | 1.68692  |
|                     | H       | -0.13825        | -1.25849 | 2.25278  | -0.07149      | -1.61273 | 1.95419  |
|                     | H       | 1.50480         | -0.57902 | 2.41036  | 1.16609       | -0.52875 | 2.59493  |
| H                   | 1.18626 | -1.89798        | 1.25061  | 1.56730  | -1.67212      | 1.31877  |          |
| 2,4-dimethyl phenyl | C       | -0.49614        | -0.16162 | -0.32842 | -0.51359      | -0.15982 | -0.31150 |
|                     | C       | -0.88701        | 0.73960  | -1.26169 | -0.91662      | 0.74812  | -1.24909 |
|                     | C       | -0.24110        | 1.97176  | -1.25692 | -0.25847      | 1.98421  | -1.25668 |
|                     | C       | 0.74535         | 2.24312  | -0.33986 | 0.75585       | 2.25261  | -0.34083 |
|                     | C       | 1.08955         | 1.26493  | 0.58626  | 1.10899       | 1.26666  | 0.58613  |
|                     | C       | 0.47962         | 0.03107  | 0.62150  | 0.47782       | 0.01831  | 0.62833  |
|                     | H       | -0.52510        | 2.73002  | -1.99346 | -0.54271      | 2.73568  | -1.98336 |
|                     | C       | 1.45569         | 3.58211  | -0.32554 | 1.46093       | 3.58584  | -0.33323 |
|                     | H       | 1.31573         | 4.08926  | 0.64201  | 1.21633       | 4.15801  | 0.56472  |
|                     | H       | 2.53784         | 3.45296  | -0.48429 | 2.54520       | 3.46276  | -0.35094 |
|                     | H       | 1.06881         | 4.24019  | -1.11711 | 1.17881       | 4.18844  | -1.19570 |
|                     | C       | 0.85620         | -1.03153 | 1.63042  | 0.86345       | -1.04345 | 1.62419  |
|                     | H       | -0.01339        | -1.30545 | 2.24657  | 0.00251       | -1.35713 | 2.21628  |
|                     | H       | 1.65542         | -0.66946 | 2.29311  | 1.63192       | -0.68092 | 2.30580  |

|                     |                 |          |          |          |          |          |          |
|---------------------|-----------------|----------|----------|----------|----------|----------|----------|
|                     | H               | 1.20791  | -1.94130 | 1.12104  | 1.24810  | -1.93185 | 1.12024  |
|                     | H               | -1.67208 | 0.51837  | -1.98856 | -1.70485 | 0.53573  | -1.95973 |
|                     | H               | 1.87724  | 1.48060  | 1.31911  | 1.90087  | 1.47141  | 1.29953  |
| 2,6-dimethyl phenyl | C               | -0.59881 | -0.17703 | -0.23806 | -0.61464 | -0.18595 | -0.23534 |
|                     | C               | -0.96190 | 0.79972  | -1.14107 | -0.98224 | 0.80296  | -1.14064 |
|                     | C               | -0.27528 | 1.99412  | -1.19844 | -0.28793 | 2.00562  | -1.20482 |
|                     | C               | 0.79377  | 2.24125  | -0.35199 | 0.80149  | 2.24911  | -0.35515 |
|                     | C               | 1.08940  | 1.22503  | 0.51147  | 1.09859  | 1.22206  | 0.50793  |
|                     | C               | 0.46241  | 0.01751  | 0.63165  | 0.46772  | 0.00801  | 0.63578  |
|                     | H               | -0.57232 | 2.76284  | -1.91957 | -0.58432 | 2.76739  | -1.91635 |
|                     | C               | 1.57068  | 3.54000  | -0.38630 | 1.57619  | 3.54073  | -0.39015 |
|                     | H               | 1.51896  | 4.04906  | 0.58782  | 1.48030  | 4.08100  | 0.55332  |
|                     | H               | 2.63090  | 3.35218  | -0.61299 | 2.63958  | 3.35738  | -0.54972 |
|                     | H               | 1.16268  | 4.21273  | -1.15452 | 1.21841  | 4.18900  | -1.18906 |
|                     | H               | -1.15119 | -1.12187 | -0.20123 | -1.16438 | -1.11906 | -0.19633 |
|                     | C               | 0.88945  | -1.03161 | 1.63588  | 0.89643  | -1.03767 | 1.63194  |
|                     | H               | 0.24855  | -1.92185 | 1.55901  | 0.28474  | -1.93460 | 1.54379  |
|                     | H               | 0.82049  | -0.63828 | 2.66119  | 0.80822  | -0.66548 | 2.65399  |
|                     | H               | 1.93244  | -1.33511 | 1.46036  | 1.93932  | -1.32011 | 1.48090  |
| H                   | -1.80213        | 0.62551  | -1.81798 | -1.81937 | 0.63382  | -1.80487 |          |
| PC <sub>m</sub>     | C               | -0.09471 | 0.12900  | -1.39102 | -0.18490 | 0.16969  | -1.47306 |
|                     | C               | -0.46094 | 1.24329  | -0.66723 | -0.56533 | 1.29800  | -0.77494 |
|                     | C               | 0.42117  | 2.30333  | -0.49658 | 0.33688  | 2.33752  | -0.55424 |
|                     | C               | 1.70691  | 2.25306  | -1.05706 | 1.65367  | 2.25594  | -1.03654 |
|                     | C               | 2.07257  | 1.14248  | -1.78198 | 2.03540  | 1.12045  | -1.73062 |
|                     | C               | 1.18801  | 0.04824  | -1.97341 | 1.13538  | 0.04418  | -1.98013 |
|                     | H               | -1.45507 | 1.29149  | -0.21497 | -1.57487 | 1.37788  | -0.39347 |
|                     | H               | 0.12087  | 3.17642  | 0.08903  | 0.02252  | 3.21604  | -0.00566 |
|                     | H               | 3.07505  | 1.08736  | -2.21940 | 3.04451  | 1.04682  | -2.11832 |
|                     | C               | 2.67322  | 3.39440  | -0.83053 | 2.61867  | 3.38796  | -0.79880 |
|                     | H               | 2.91492  | 3.48364  | 0.24099  | 2.74831  | 3.57748  | 0.26848  |
|                     | H               | 3.61020  | 3.23666  | -1.38364 | 3.59827  | 3.17292  | -1.22304 |
|                     | H               | 2.23123  | 4.34883  | -1.15653 | 2.25318  | 4.31346  | -1.24820 |
|                     | H               | 2.20182  | 0.44529  | 0.37849  | 2.65903  | 0.26917  | 0.54530  |
|                     | Br              | 2.53369  | -0.14943 | 1.64318  | 3.21277  | -0.23372 | 1.76819  |
|                     | C               | 1.59158  | -1.09371 | -2.71329 | 1.53892  | -1.08909 | -2.69507 |
|                     | H               | 0.91314  | -1.93629 | -2.84982 | 0.85366  | -1.90314 | -2.88136 |
|                     | H               | 2.58780  | -1.15066 | -3.15283 | 2.54541  | -1.18018 | -3.07699 |
|                     | H               | -0.79088 | -0.70478 | -1.51355 | -0.89090 | -0.63278 | -1.64167 |
|                     | RC <sub>m</sub> | C        | -0.13798 | -0.23350 | -0.32693 | -0.17979 | -0.20392 |
| C                   |                 | -0.73362 | 0.99019  | -0.72715 | -0.74267 | 1.00317  | -0.78053 |
| C                   |                 | 0.01805  | 2.16904  | -0.74406 | 0.00632  | 2.17690  | -0.73938 |
| C                   |                 | 1.37935  | 2.15799  | -0.35770 | 1.33483  | 2.16665  | -0.32151 |
| C                   |                 | 2.00249  | 0.96889  | 0.04631  | 1.93852  | 0.98204  | 0.07200  |
| C                   |                 | 1.23586  | -0.22444 | 0.04322  | 1.16107  | -0.19958 | 0.05443  |
| H                   |                 | -1.78889 | 1.00371  | -1.01760 | -1.77023 | 1.03232  | -1.11790 |
| H                   |                 | -0.44948 | 3.10915  | -1.05239 | -0.44997 | 3.11061  | -1.04127 |
| C                   |                 | -0.90562 | -1.52996 | -0.43034 | -0.95076 | -1.49030 | -0.44843 |
| H                   |                 | -0.41442 | -2.32735 | 0.14591  | -1.05227 | -1.91698 | 0.55090  |
| H                   |                 | -0.96841 | -1.84688 | -1.48513 | -0.43664 | -2.23006 | -1.06591 |
| H                   |                 | -1.93028 | -1.40808 | -0.04711 | -1.94735 | -1.33862 | -0.85943 |
| H                   |                 | 1.71461  | -1.17325 | 0.31208  | 1.64916  | -1.14569 | 0.24502  |
| Br                  |                 | -0.10387 | -0.06663 | 2.44888  | 0.63368  | -0.29513 | 2.73292  |
| H                   |                 | 1.95140  | 3.09150  | -0.36432 | 1.90135  | 3.08824  | -0.30666 |
| C                   |                 | 3.43621  | 0.93589  | 0.51875  | 3.37626  | 0.92809  | 0.49808  |



|                        |    |          |          |          |          |          |          |
|------------------------|----|----------|----------|----------|----------|----------|----------|
|                        | H  | 3.93906  | 1.89641  | 0.33077  | 3.83566  | 1.91464  | 0.47079  |
|                        | H  | 4.00440  | 0.14039  | 0.01002  | 3.95208  | 0.26775  | -0.15454 |
|                        | H  | 3.47166  | 0.73346  | 1.60276  | 3.46128  | 0.53640  | 1.51277  |
| <b>3-methyl benzyl</b> | C  | -0.72718 | -0.42121 | -0.10488 | -0.73087 | -0.42058 | -0.10306 |
|                        | C  | -1.00434 | 0.58228  | -1.02817 | -1.00786 | 0.58481  | -1.02853 |
|                        | C  | -0.23685 | 1.72489  | -1.07620 | -0.23666 | 1.72801  | -1.07719 |
|                        | C  | 0.84667  | 1.89357  | -0.18457 | 0.85443  | 1.90211  | -0.18497 |
|                        | C  | 1.10677  | 0.85442  | 0.74661  | 1.10940  | 0.85704  | 0.74630  |
|                        | C  | 0.34130  | -0.28487 | 0.79431  | 0.33872  | -0.28886 | 0.79728  |
|                        | H  | -1.84057 | 0.46090  | -1.72215 | -1.83670 | 0.46581  | -1.71436 |
|                        | H  | -0.45764 | 2.51123  | -1.80303 | -0.45625 | 2.50579  | -1.79702 |
|                        | H  | 1.94392  | 0.97474  | 1.44215  | 1.93839  | 0.97354  | 1.43414  |
|                        | C  | 1.64945  | 3.06197  | -0.21704 | 1.64757  | 3.05510  | -0.21936 |
|                        | H  | 2.48411  | 3.18595  | 0.47376  | 2.47749  | 3.18340  | 0.46047  |
|                        | H  | 1.44605  | 3.85799  | -0.93419 | 1.44981  | 3.84684  | -0.92744 |
|                        | H  | -1.34470 | -1.32356 | -0.07752 | -1.34520 | -1.31178 | -0.07702 |
|                        | C  | 0.63063  | -1.38512 | 1.79313  | 0.63049  | -1.38313 | 1.79124  |
|                        | H  | -0.23862 | -1.55345 | 2.44847  | -0.23332 | -1.57549 | 2.43086  |
|                        | H  | 1.49451  | -1.12986 | 2.42382  | 1.47181  | -1.12454 | 2.43291  |
|                        | H  | 0.84812  | -2.33271 | 1.27529  | 0.87038  | -2.32088 | 1.28551  |
| <b>TS<sub>m</sub></b>  | C  | -0.96910 | -0.31088 | -0.17329 | -0.97782 | -0.33649 | -0.18044 |
|                        | C  | -1.33850 | 0.78316  | -0.93697 | -1.34889 | 0.76808  | -0.94299 |
|                        | C  | -0.48439 | 1.85622  | -1.07067 | -0.49465 | 1.84625  | -1.07166 |
|                        | C  | 0.76182  | 1.83507  | -0.44043 | 0.76649  | 1.83401  | -0.43722 |
|                        | C  | 1.11469  | 0.71894  | 0.33448  | 1.11407  | 0.70234  | 0.33655  |
|                        | C  | 0.26838  | -0.35382 | 0.47372  | 0.26378  | -0.38111 | 0.47109  |
|                        | H  | -2.31232 | 0.79438  | -1.43298 | -2.31211 | 0.78078  | -1.43514 |
|                        | H  | -0.77326 | 2.72512  | -1.66796 | -0.78394 | 2.70771  | -1.65877 |
|                        | H  | 2.08828  | 0.71116  | 0.83538  | 2.07556  | 0.69185  | 0.83510  |
|                        | C  | 1.66177  | 2.96887  | -0.54509 | 1.65117  | 2.94670  | -0.54368 |
|                        | H  | 1.28431  | 3.77152  | 0.58578  | 1.29024  | 3.87872  | 0.63592  |
|                        | H  | 2.71204  | 2.82381  | -0.27063 | 2.68494  | 2.82528  | -0.24489 |
|                        | H  | 1.46946  | 3.71019  | -1.32791 | 1.46416  | 3.69238  | -1.30629 |
|                        | H  | -1.65572 | -1.15690 | -0.07266 | -1.65788 | -1.17380 | -0.08600 |
|                        | C  | 0.64968  | -1.55820 | 1.30707  | 0.64878  | -1.58229 | 1.29364  |
|                        | H  | 0.64709  | -2.47220 | 0.69281  | 0.66387  | -2.48816 | 0.68434  |
|                        | H  | -0.06924 | -1.70226 | 2.12868  | -0.06572 | -1.74943 | 2.10189  |
|                        | H  | 1.65156  | -1.43568 | 1.74234  | 1.63514  | -1.46040 | 1.73843  |
|                        | Br | 0.94958  | 4.71598  | 1.81143  | 1.03891  | 4.92205  | 1.78322  |

**Table S6** Optimized geometries in cartesian coordinates (Å) of various species involved in the reaction of *p*-xylene + Br.

| Species             |          | MP2/aug-cc-pVDZ |          |          | B3LYP/cc-pVTZ |          |          |
|---------------------|----------|-----------------|----------|----------|---------------|----------|----------|
|                     |          | X               | Y        | Z        | X             | Y        | Z        |
| <i>p</i> -xylene    | C        | -0.29482        | -0.29679 | -0.04485 | -0.28308      | -0.28769 | -0.04802 |
|                     | C        | -0.66830        | 0.80823  | -0.83402 | -0.66777      | 0.81661  | -0.80266 |
|                     | C        | 0.05756         | 2.01487  | -0.78434 | 0.04840       | 2.00906  | -0.75258 |
|                     | C        | 1.17914         | 2.15344  | 0.05603  | 1.17511       | 2.13980  | 0.05376  |
|                     | C        | 1.55397         | 1.04498  | 0.84780  | 1.56319       | 1.03019  | 0.80913  |
|                     | C        | 0.83033         | -0.15797 | 0.79827  | 0.85002       | -0.15756 | 0.75913  |
|                     | H        | -1.53696        | 0.72724  | -1.49653 | -1.53937      | 0.74743  | -1.44217 |
|                     | H        | -0.25451        | 2.85912  | -1.40875 | -0.27650      | 2.84906  | -1.35443 |
|                     | H        | 2.42300         | 1.12571  | 1.51072  | 2.43921       | 1.09779  | 1.44344  |
|                     | H        | 1.14279         | -1.00245 | 1.42310  | 1.17909       | -1.00049 | 1.35530  |
|                     | C        | 1.96622         | 3.44451  | 0.11754  | 1.95082       | 3.42974  | 0.12005  |
|                     | H        | 1.96339         | 3.86017  | 1.13859  | 1.88094       | 3.88400  | 1.11126  |
|                     | H        | 3.01707         | 3.28027  | -0.17234 | 3.01102       | 3.26805  | -0.08432 |
|                     | C        | -1.06689        | -1.59757 | -0.09003 | -1.06104      | -1.57739 | -0.08633 |
| H                   | -1.47211 | -1.85069        | 0.90346  | -1.57530 | -1.75814      | 0.86075  |          |
| H                   | -0.41834 | -2.43062        | -0.40738 | -0.40617 | -2.43238      | -0.26394 |          |
| H                   | -1.90908 | -1.53306        | -0.79560 | -1.81430 | -1.56305      | -0.87333 |          |
| H                   | 1.53971  | 4.20013         | -0.55952 | 1.57789  | 4.15449       | -0.60290 |          |
| 4-methyl benzyl     | C        | -0.19647        | -0.34856 | 0.05500  | -0.20586      | -0.35575 | 0.05788  |
|                     | C        | 1.20893         | -0.25585 | -0.06322 | 1.21119       | -0.26232 | -0.00503 |
|                     | C        | 1.85005         | 0.96170  | 0.00518  | 1.85189       | 0.95667  | 0.05267  |
|                     | C        | 1.14058         | 2.14787  | 0.19321  | 1.13608       | 2.15569  | 0.17709  |
|                     | C        | -0.25464        | 2.06674  | 0.31171  | -0.26296      | 2.07781  | 0.23569  |
|                     | C        | -0.90805        | 0.86403  | 0.24596  | -0.91978      | 0.86784  | 0.17943  |
|                     | H        | 1.78924         | -1.17117 | -0.21130 | 1.78981       | -1.17204 | -0.10389 |
|                     | H        | 2.93947         | 1.00152  | -0.08979 | 2.93343       | 0.99123  | -0.00092 |
|                     | H        | -0.83119        | 2.98556  | 0.45980  | -0.83893      | 2.99110  | 0.32526  |
|                     | H        | -1.99720        | 0.82666  | 0.34116  | -2.00114      | 0.83813  | 0.22392  |
|                     | C        | 1.84133         | 3.48477  | 0.26863  | 1.84438       | 3.47823  | 0.27462  |
|                     | H        | 1.48542         | 4.16060  | -0.52607 | 1.25206       | 4.28154  | -0.16464 |
|                     | H        | 1.64571         | 3.97724  | 1.23515  | 2.03250       | 3.74958  | 1.31783  |
|                     | C        | -0.86750        | -1.59550 | -0.01375 | -0.86490      | -1.58850 | -0.00133 |
|                     | H        | -0.31047        | -2.52139 | -0.16081 | -0.31294      | -2.51251 | -0.09543 |
|                     | H        | -1.95258        | -1.65148 | 0.07915  | -1.94267      | -1.64803 | 0.04554  |
|                     | H        | 2.92932         | 3.36821  | 0.15746  | 2.80978       | 3.45230  | -0.23122 |
| 2,5-dimethyl phenyl | C        | -0.32918        | -0.25235 | 0.01248  | -0.34170      | -0.26123 | 0.02445  |
|                     | C        | -0.74298        | 0.86776  | -0.66759 | -0.73817      | 0.86258  | -0.69709 |
|                     | C        | 0.02556         | 2.02336  | -0.69177 | 0.03053       | 2.02356  | -0.72793 |
|                     | C        | 1.23501         | 2.10950  | -0.04066 | 1.24199       | 2.11834  | -0.03296 |
|                     | C        | 1.59085         | 0.95764  | 0.61920  | 1.57894       | 0.97802  | 0.66212  |
|                     | C        | 0.89072         | -0.20055 | 0.68317  | 0.87087       | -0.18748 | 0.73305  |
|                     | H        | -1.69718        | 0.85084  | -1.20159 | -1.67005      | 0.83461  | -1.24786 |
|                     | H        | -0.33922        | 2.89601  | -1.24562 | -0.31484      | 2.87738  | -1.30004 |
|                     | H        | 1.26179         | -1.06700 | 1.23812  | 1.21929       | -1.03364 | 1.31345  |
|                     | C        | 2.09083         | 3.35677  | -0.05184 | 2.09277       | 3.36037  | -0.04999 |
|                     | H        | 2.24956         | 3.73133  | 0.97078  | 2.26118       | 3.73651  | 0.96027  |
|                     | H        | 3.07825         | 3.14961  | -0.49152 | 3.07292       | 3.15955  | -0.48611 |
|                     | C        | -1.16349        | -1.51671 | 0.04265  | -1.16407      | -1.52330 | 0.04072  |
|                     | H        | -1.43321        | -1.78072 | 1.07715  | -1.26530      | -1.91908 | 1.05237  |

|                       |                       |          |          |          |          |          |          |
|-----------------------|-----------------------|----------|----------|----------|----------|----------|----------|
|                       | H                     | -0.60401 | -2.36280 | -0.38601 | -0.69998 | -2.30427 | -0.56666 |
|                       | H                     | -2.09077 | -1.38793 | -0.53409 | -2.16409 | -1.34812 | -0.35451 |
|                       | H                     | 1.60664  | 4.14906  | -0.64141 | 1.61888  | 4.15002  | -0.63186 |
| <b>TS<sub>p</sub></b> | C                     | -0.00098 | -0.02262 | -0.00252 | -0.02422 | -0.02962 | -0.01631 |
|                       | C                     | 0.07168  | 0.12767  | 1.37702  | 0.05579  | 0.12193  | 1.37259  |
|                       | C                     | 1.27684  | 0.03922  | 2.03629  | 1.26476  | 0.03664  | 2.03387  |
|                       | C                     | 2.45918  | -0.21291 | 1.33510  | 2.46335  | -0.21392 | 1.32978  |
|                       | C                     | 2.38152  | -0.35762 | -0.05929 | 2.37608  | -0.35732 | -0.07505 |
|                       | C                     | 1.17927  | -0.26802 | -0.70792 | 1.16372  | -0.27043 | -0.72323 |
|                       | H                     | -0.84331 | 0.32120  | 1.94386  | -0.84830 | 0.31139  | 1.93708  |
|                       | H                     | 1.31596  | 0.16552  | 3.12218  | 1.30286  | 0.16291  | 3.10809  |
|                       | H                     | 3.29766  | -0.54526 | -0.62693 | 3.28051  | -0.53795 | -0.64141 |
|                       | H                     | 1.13813  | -0.38758 | -1.79481 | 1.12490  | -0.38784 | -1.79915 |
|                       | C                     | 3.73480  | -0.27287 | 2.01907  | 3.71581  | -0.28104 | 2.00307  |
|                       | H                     | 4.58669  | -0.71244 | 1.48941  | 4.57198  | -0.68694 | 1.47886  |
|                       | H                     | 4.18024  | 1.10100  | 1.98303  | 4.25814  | 1.17390  | 2.02223  |
|                       | C                     | -1.31924 | 0.07741  | -0.73408 | -1.33878 | 0.05885  | -0.73841 |
|                       | H                     | -1.53372 | -0.85835 | -1.27433 | -1.58586 | -0.88952 | -1.22163 |
|                       | H                     | -1.28754 | 0.89132  | -1.47570 | -1.30638 | 0.81694  | -1.52366 |
|                       | H                     | -2.14675 | 0.27424  | -0.03794 | -2.15200 | 0.31055  | -0.05965 |
|                       | H                     | 3.73314  | -0.39602 | 3.10729  | 3.72611  | -0.38995 | 3.08039  |
|                       | Br                    | 4.74642  | 2.57785  | 1.98908  | 4.92155  | 2.59317  | 2.12135  |
|                       | <b>RC<sub>p</sub></b> | C        | -0.13150 | -0.23849 | -0.33647 | -0.18347 | -0.20917 |
| C                     |                       | -0.72694 | 0.99910  | -0.69270 | -0.74114 | 1.01387  | -0.77269 |
| C                     |                       | 0.01141  | 2.18529  | -0.65776 | -0.00032 | 2.18929  | -0.69828 |
| C                     |                       | 1.37867  | 2.19348  | -0.27346 | 1.33491  | 2.19613  | -0.27412 |
| C                     |                       | 1.97870  | 0.97443  | 0.07243  | 1.90186  | 0.98063  | 0.07152  |
| C                     |                       | 1.23789  | -0.22881 | 0.04970  | 1.15909  | -0.20988 | 0.01373  |
| H                     |                       | -1.77980 | 1.01871  | -0.99274 | -1.76857 | 1.05425  | -1.11068 |
| H                     |                       | -0.47190 | 3.12986  | -0.93127 | -0.46942 | 3.12494  | -0.97791 |
| H                     |                       | 3.03022  | 0.95233  | 0.37579  | 2.93156  | 0.93745  | 0.40033  |
| C                     |                       | 2.14604  | 3.49428  | -0.22348 | 2.10782  | 3.48386  | -0.18075 |
| H                     |                       | 1.76096  | 4.13969  | 0.58337  | 1.80386  | 4.05691  | 0.69854  |
| H                     |                       | 3.21573  | 3.31673  | -0.03720 | 3.17805  | 3.29936  | -0.09895 |
| C                     |                       | -0.89090 | -1.53393 | -0.49466 | -0.95835 | -1.49062 | -0.51443 |
| H                     |                       | -0.40113 | -2.34857 | 0.05826  | -1.07671 | -1.93513 | 0.47553  |
| H                     |                       | -0.94018 | -1.81364 | -1.56061 | -0.43918 | -2.22232 | -1.13711 |
| H                     |                       | -1.92019 | -1.43205 | -0.11805 | -1.94851 | -1.32721 | -0.93662 |
| H                     |                       | 2.04540  | 4.04760  | -1.17123 | 1.93733  | 4.11480  | -1.05405 |
| H                     |                       | 1.72962  | -1.17752 | 0.28745  | 1.65942  | -1.15262 | 0.18270  |
| Br                    |                       | -0.14966 | -0.19937 | 2.45094  | 0.69422  | -0.42541 | 2.72769  |
| <b>PC<sub>p</sub></b> |                       | C        | -0.05374 | 0.14488  | -1.52973 | -0.11948 | 0.19942  |
|                       | C                     | -0.44530 | 1.22718  | -0.71124 | -0.54595 | 1.34694  | -0.77833 |
|                       | C                     | 0.40811  | 2.27924  | -0.46401 | 0.30646  | 2.40458  | -0.54272 |
|                       | C                     | 1.69168  | 2.31931  | -1.00801 | 1.63079  | 2.39731  | -1.00215 |
|                       | C                     | 2.08796  | 1.25436  | -1.82959 | 2.06537  | 1.27173  | -1.71886 |
|                       | C                     | 1.24904  | 0.19746  | -2.08594 | 1.22673  | 0.20289  | -1.96243 |
|                       | H                     | -1.44239 | 1.21711  | -0.26199 | -1.56415 | 1.38370  | -0.41269 |
|                       | H                     | 0.07792  | 3.09720  | 0.18307  | -0.05475 | 3.26356  | 0.00951  |
|                       | H                     | 3.09240  | 1.26139  | -2.26493 | 3.08137  | 1.24477  | -2.09390 |
|                       | C                     | 2.64500  | 3.44987  | -0.70244 | 2.56317  | 3.54008  | -0.71312 |
|                       | H                     | 3.46846  | 3.09741  | -0.05904 | 3.14606  | 3.35259  | 0.19341  |
|                       | H                     | 3.09068  | 3.85176  | -1.62615 | 3.27355  | 3.69147  | -1.52648 |
|                       | C                     | -0.91992 | -0.95190 | -1.77953 | -0.97867 | -0.87562 | -1.74989 |
|                       | H                     | -1.91773 | -0.98458 | -1.34133 | -1.99918 | -0.86739 | -1.39568 |

|    |          |          |          |          |          |          |
|----|----------|----------|----------|----------|----------|----------|
| H  | -0.60027 | -1.78259 | -2.40924 | -0.64328 | -1.74226 | -2.30079 |
| H  | 2.13183  | 4.26962  | -0.17898 | 2.01722  | 4.47097  | -0.56077 |
| H  | 1.98105  | 0.04079  | 0.20919  | 2.40989  | -0.52662 | 0.21499  |
| H  | 1.58646  | -0.62643 | -2.72161 | 1.58636  | -0.64657 | -2.52927 |
| Br | 2.33706  | -0.44982 | 1.50756  | 3.06680  | -1.19929 | 1.29587  |

**Table S7.** G3 standard heat of reaction ( $\Delta_{\text{rxn},0\text{K}}H^0$ ) for various substitution reactions of toluene + Br reaction system. The  $\Delta_{\text{rxn},0\text{K}}H^0$  of Reaction (R1) appears to be lower than the other substitution reactions of Br atoms. However, the transition state responsible for methyl substitution by Br atom lies at 156.7 kJ/mol higher in energy than the reactants. For toluene + Br system, the reactions (R1-R4) appear kinetically irrelevant. These results are taken from our recent work (Giri et al., *Int. J. Chem. Kinet.*, 2021, **53**, 390-402).

| Reaction                                                                                                   | $\Delta_{\text{rxn},0\text{K}}H^0$<br>(kJ/mol) |
|------------------------------------------------------------------------------------------------------------|------------------------------------------------|
| $\text{C}_6\text{H}_5\text{CH}_3 + \text{Br} \rightarrow \text{C}_6\text{H}_5\text{Br} + \text{CH}_3$ (R1) | 74                                             |
| $\text{C}_6\text{H}_5\text{CH}_3 + \text{Br} \rightarrow$ 2-bromotoluene + H (R2)                          | 113.2                                          |
| $\text{C}_6\text{H}_5\text{CH}_3 + \text{Br} \rightarrow$ 3-bromotoluene + H (R3)                          | 115.1                                          |
| $\text{C}_6\text{H}_5\text{CH}_3 + \text{Br} \rightarrow$ 4-bromotoluene + H (R4)                          | 116.1                                          |

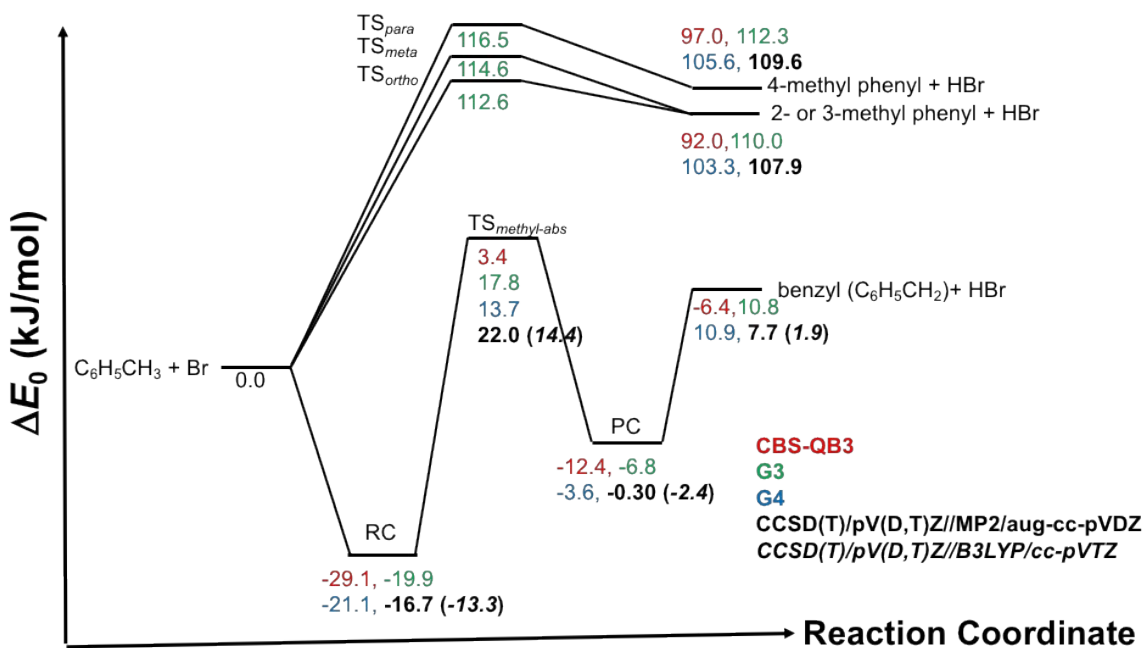

**Figure S1:** Zero-point energy corrected potential energy surface for the toluene + Br reaction. The relative energies are provided with a color code to identify the various *ab initio* methods employed. These results are taken from our recent work (Giri et al., *Int. J. Chem. Kinet.*, 2021, 53, 390-402).

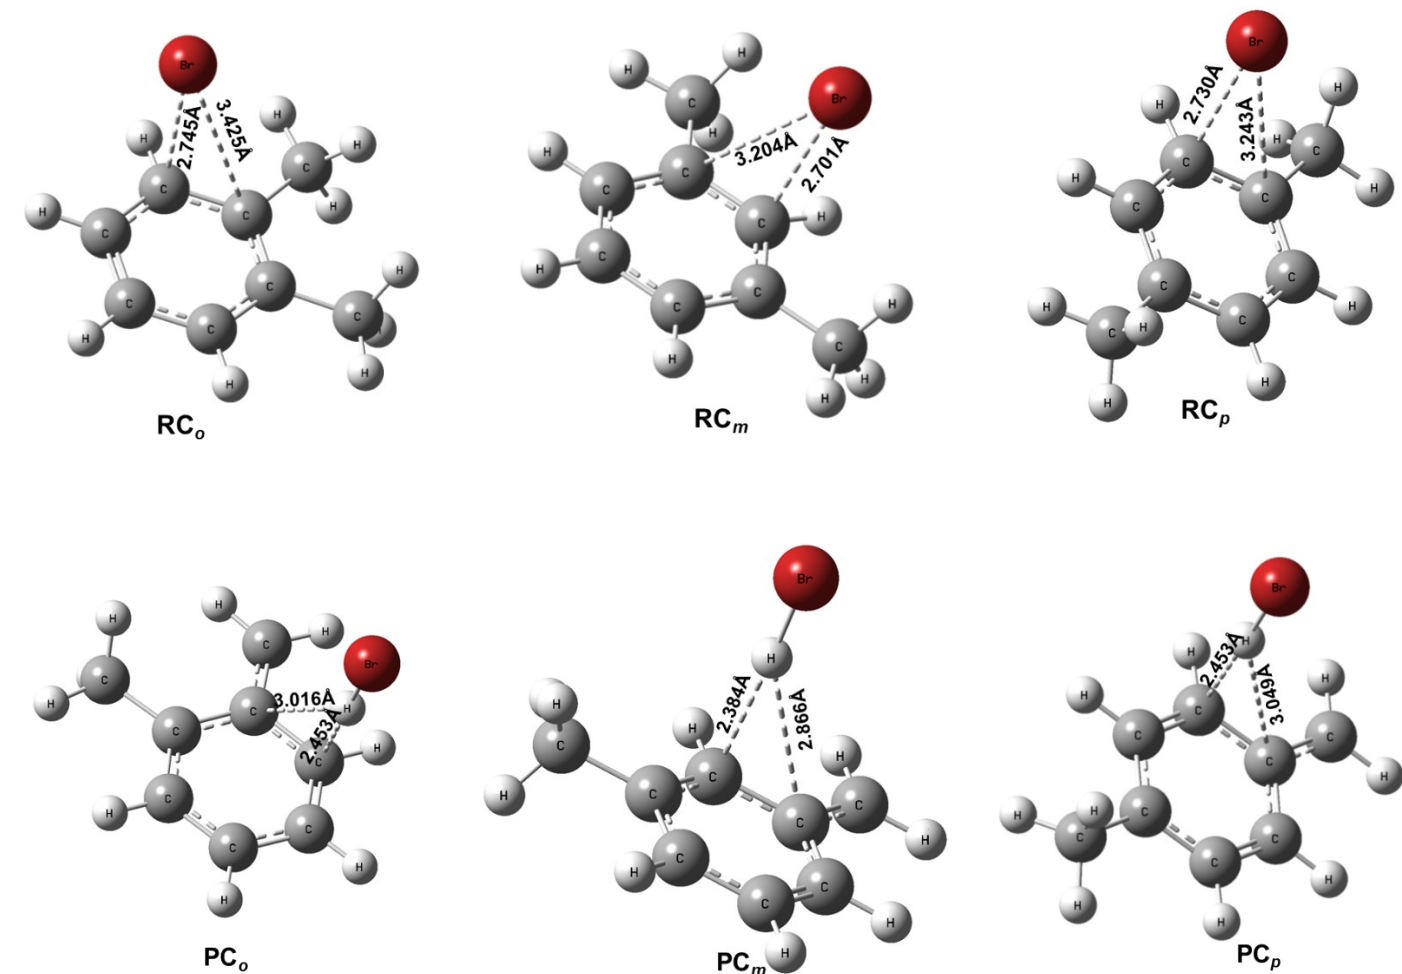

**Figure S2:** The geometrical parameters for the optimized structures of pre-reactive and post-reactive complexes at B3LYP/6-31G(2df,p) levels of theory.

**Table S8:** Calculated rate coefficients based on the molecular parameters and energetics from G4 composite method for the hydrogen abstraction reactions of xylenes by Br atoms. For  $k_{1b}(T)$  calculations, the barrier heights are lowered by  $\leq 1.5$  kJ/mol to match with the experimental data (see main text for detail explanation). The units are in  $\text{cm}^3 \text{ molecule}^{-1}$ ,  $\text{s}^{-1}$  and  $\text{cm}^3 \text{ molecule}^{-1} \text{ s}^{-1}$  for  $K_{1a}(T)$ ,  $k_{1b}(T)$  and  $k_{ov}(T)$ , respectively.

| T/K | <i>o</i> -xylene + Br<br>(G4)-parameters |             |             | <i>m</i> -xylene + Br<br>(G4)-parameters |             |             | <i>p</i> -xylene + Br<br>(G4)-parameters |             |             |
|-----|------------------------------------------|-------------|-------------|------------------------------------------|-------------|-------------|------------------------------------------|-------------|-------------|
|     | $K_{1a}(T)$                              | $k_{1b}(T)$ | $k_{ov}(T)$ | $K_{1a}(T)$                              | $k_{1b}(T)$ | $k_{ov}(T)$ | $K_{1a}(T)$                              | $k_{1b}(T)$ | $k_{ov}(T)$ |
| 200 | 7.57E-19                                 | 1.90E+04    | 1.44E-14    | 8.87E-18                                 | 4.56E+02    | 4.04E-15    | 4.99E-19                                 | 1.97E+04    | 9.84E-15    |
| 225 | 1.70E-19                                 | 1.48E+05    | 2.52E-14    | 1.37E-18                                 | 5.90E+03    | 8.08E-15    | 1.10E-19                                 | 1.75E+05    | 1.93E-14    |
| 250 | 5.25E-20                                 | 7.69E+05    | 4.04E-14    | 3.13E-19                                 | 4.61E+04    | 1.44E-14    | 3.34E-20                                 | 1.01E+06    | 3.38E-14    |
| 275 | 2.03E-20                                 | 2.98E+06    | 6.06E-14    | 9.49E-20                                 | 2.50E+05    | 2.37E-14    | 1.28E-20                                 | 4.30E+06    | 5.48E-14    |
| 298 | 9.87E-21                                 | 8.54E+06    | 8.42E-14    | 3.82E-20                                 | 9.27E+05    | 3.54E-14    | 6.13E-21                                 | 1.32E+07    | 8.08E-14    |
| 300 | 9.32E-21                                 | 9.29E+06    | 8.65E-14    | 3.55E-20                                 | 1.03E+06    | 3.66E-14    | 5.78E-21                                 | 1.44E+07    | 8.34E-14    |
| 325 | 4.86E-21                                 | 2.45E+07    | 1.19E-13    | 1.56E-20                                 | 3.44E+06    | 5.38E-14    | 2.99E-21                                 | 4.06E+07    | 1.21E-13    |
| 350 | 2.81E-21                                 | 5.65E+07    | 1.59E-13    | 7.80E-21                                 | 9.75E+06    | 7.60E-14    | 1.71E-21                                 | 9.91E+07    | 1.70E-13    |
| 375 | 1.76E-21                                 | 1.17E+08    | 2.06E-13    | 4.30E-21                                 | 2.42E+07    | 1.04E-13    | 1.07E-21                                 | 2.16E+08    | 2.30E-13    |
| 400 | 1.17E-21                                 | 2.24E+08    | 2.63E-13    | 2.57E-21                                 | 5.40E+07    | 1.39E-13    | 7.07E-22                                 | 4.31E+08    | 3.05E-13    |
| 425 | 8.25E-22                                 | 3.98E+08    | 3.29E-13    | 1.64E-21                                 | 1.10E+08    | 1.81E-13    | 4.96E-22                                 | 7.96E+08    | 3.95E-13    |
| 450 | 6.07E-22                                 | 6.67E+08    | 4.05E-13    | 1.11E-21                                 | 2.09E+08    | 2.32E-13    | 3.63E-22                                 | 1.38E+09    | 5.02E-13    |
| 475 | 4.63E-22                                 | 1.07E+09    | 4.94E-13    | 7.85E-22                                 | 3.72E+08    | 2.92E-13    | 2.76E-22                                 | 2.27E+09    | 6.28E-13    |
| 500 | 3.65E-22                                 | 1.63E+09    | 5.94E-13    | 5.77E-22                                 | 6.28E+08    | 3.62E-13    | 2.17E-22                                 | 3.58E+09    | 7.75E-13    |

**Table S9:** Calculated rate coefficients based on the molecular parameters and energetics from CCSD(T)/cc-pV(D,T)//MP2/aug-cc-pVDZ level of theory for the hydrogen abstraction reactions of xylenes by Br atoms. The calculated rate coefficients for *o*-xylene + Br are ca. 50% lower than the experimental values (not provided in the table). For  $k_{1b}(T)$  calculations, the barrier heights are lowered by  $\leq 1.5$  kJ/mol to match with the experimental data (see main text for detail explanation). The units are in  $\text{cm}^3 \text{ molecule}^{-1}, \text{ s}^{-1}$  and  $\text{cm}^3 \text{ molecule}^{-1} \text{ s}^{-1}$  for  $K_{1a}(T)$ ,  $k_{1b}(T)$  and  $k_{ov.}(T)$ , respectively.

| T/K | <i>m</i> -xylene + Br<br>(CCSD(T)/cc-pV(D,T)//MP2/aug-cc-pVDZ)-parameters |             |              | <i>p</i> -xylene + Br<br>(CCSD(T)/cc-pV(D,T)//MP2/aug-cc-pVDZ)-parameters |             |              |
|-----|---------------------------------------------------------------------------|-------------|--------------|---------------------------------------------------------------------------|-------------|--------------|
|     | $K_{1a}(T)$                                                               | $k_{1b}(T)$ | $k_{ov.}(T)$ | $K_{1a}(T)$                                                               | $k_{1b}(T)$ | $k_{ov.}(T)$ |
| 200 | 8.68E-19                                                                  | 8.41E+03    | 7.30E-15     | 5.71E-19                                                                  | 3.22E+04    | 1.84E-14     |
| 225 | 1.51E-19                                                                  | 8.13E+04    | 1.23E-14     | 1.06E-19                                                                  | 2.71E+05    | 2.87E-14     |
| 250 | 3.79E-20                                                                  | 5.06E+05    | 1.92E-14     | 2.81E-20                                                                  | 1.50E+06    | 4.22E-14     |
| 275 | 1.24E-20                                                                  | 2.28E+06    | 2.83E-14     | 9.61E-21                                                                  | 6.14E+06    | 5.91E-14     |
| 298 | 5.28E-21                                                                  | 7.37E+06    | 3.89E-14     | 4.24E-21                                                                  | 1.84E+07    | 7.78E-14     |
| 300 | 4.93E-21                                                                  | 8.09E+06    | 3.99E-14     | 3.97E-21                                                                  | 2.00E+07    | 7.96E-14     |
| 325 | 2.29E-21                                                                  | 2.38E+07    | 5.44E-14     | 1.90E-21                                                                  | 5.48E+07    | 1.04E-13     |
| 350 | 1.19E-21                                                                  | 6.04E+07    | 7.19E-14     | 1.02E-21                                                                  | 1.31E+08    | 1.33E-13     |
| 375 | 6.81E-22                                                                  | 1.36E+08    | 9.28E-14     | 5.95E-22                                                                  | 2.79E+08    | 1.66E-13     |
| 400 | 4.20E-22                                                                  | 2.79E+08    | 1.17E-13     | 3.74E-22                                                                  | 5.44E+08    | 2.04E-13     |
| 425 | 2.76E-22                                                                  | 5.29E+08    | 1.46E-13     | 2.50E-22                                                                  | 9.85E+08    | 2.46E-13     |
| 450 | 1.90E-22                                                                  | 9.37E+08    | 1.78E-13     | 1.76E-22                                                                  | 1.68E+09    | 2.94E-13     |
| 475 | 1.37E-22                                                                  | 1.57E+09    | 2.15E-13     | 1.29E-22                                                                  | 2.71E+09    | 3.48E-13     |
| 500 | 1.03E-22                                                                  | 2.51E+09    | 2.57E-13     | 9.75E-23                                                                  | 4.18E+09    | 4.08E-13     |
